# Supplementary material for: Rebound effects undermine carbon footprint reduction potential of autonomous electric vehicles
Source: PubMed Central journal article supplement (PMC10558530; doi:10.1038/s41467-023-41992-2), 2023-10-06
Supplement: 41467_2023_41992_MOESM1_ESM.pdf [file 41467_2023_41992_MOESM1_ESM.pdf]

1  
2  
3  
4  
5  
6  
7  
8  
9  
10  
11  
12  
13  
14  
15  
16  
17  
18  
19  
20  
21  
22  
23

## Supplementary Information File

For

### Rebound Effects Undermine Carbon Footprint Reduction Potential of Autonomous Electric Vehicles

Nuri C. Onat <sup>1,\*</sup>, Jafar Mandouri <sup>1,2</sup>, Murat Kucukvar <sup>3</sup>, Burak Sen <sup>4</sup>, Saddam A. Abbasi <sup>5,6</sup>, Wael Alhajyaseen <sup>1,7</sup>, Adeb A. Kutty <sup>1</sup>, Rateb Jabbar<sup>8</sup>, Marcello Contestabile<sup>9,10</sup>, Abdelmagid Hamouda <sup>11</sup>

<sup>1</sup> Qatar Transportation and Traffic Safety Center, College of Engineering, Qatar University, Doha, Qatar;

<sup>2</sup> Engineering Management, College of Engineering, Qatar University, Doha, Qatar.

<sup>3</sup> Department of Business Ethics & Legal Studies, Daniels College of Business, University of Denver, Denver, Colorado, USA.

<sup>4</sup> SAU Center for Research & Development, and Applied Research (SARGEM),  
Faculty of Engineering, Sakarya University, 54050 Sakarya, Turkey.

<sup>5</sup> Statistics Program, Department of Mathematics, Statistics, and Physics, College of Arts and Sciences, Qatar University, 2713, Doha, Qatar.

<sup>6</sup> Statistical Consulting Unit, College of Arts and Sciences, Qatar University, Doha, Qatar

<sup>7</sup> Department of Civil and Environmental Engineering, College of Engineering, Qatar University, Doha, Qatar.

<sup>8</sup> The KINDI Center for Computing Research, College of Engineering, Qatar University, Doha, Qatar.

<sup>9</sup> Qatar Environment and Energy Research Institute, Hamad Bin Khalifa University, Qatar Foundation, Doha, Qatar.

<sup>10</sup> Imperial College London, Faculty of Natural Sciences, Centre for Environmental Policy, London, United Kingdom.

<sup>11</sup> Department of Mechanical and Industrial Engineering, College of Engineering, Qatar University, Doha, Qatar.

\*Corresponding Author's email: [onat@qu.edu.qa](mailto:onat@qu.edu.qa)

24 TABLE OF CONTENTS

25 1. Autonomous Vehicles Supplementary Information ..... 6

26 2. Survey Results ..... 8

27 2.1 Annual Travelling Distances Analysis ..... 15

28 2.2 Generalized Linear Models ..... 26

29 2.3 Autonomous Vehicles Adoption Perceptions ..... 27

30 3. Life Cycle Assessment Supporting Information ..... 28

31 3.1 Manufacturing Phase ..... 29

32 3.2 Operation Phase..... 38

33 3.3 End-of-Life Phase ..... 39

34 3.4 Monte Carlo Simulation ..... 40

35

36

37

38 LIST OF FIGURES

39 SUPPLEMENTARY FIGURE 1 | CLUSTER BAR CHARTS FOR COVARIATE DEMOGRAPHIC CHARACTERISTICS OF RESPONDENTS. .... 11

40 SUPPLEMENTARY FIG. 2 | HISTOGRAM OF ANNUAL TRAVELING DISTANCE..... 15

41 SUPPLEMENTARY FIG. 3 | HISTOGRAM OF REBOUND EFFECT. .... 16

42 SUPPLEMENTARY FIG. 4| MINIMUM, AVERAGE, AND MAXIMUM ANNUAL REBOUND-ADJUSTED TRAVELING DISTANCES AFTER BOOTSTRAPPING. .... 18

43 SUPPLEMENTARY FIG. 5| MINIMUM ANNUAL TRAVELING DISTANCE SAMPLE AVERAGE HISTOGRAM. .... 20

44 SUPPLEMENTARY FIG. 6 | AVERAGE ANNUAL TRAVELING DISTANCE SAMPLE AVERAGE HISTOGRAM..... 21

45 SUPPLEMENTARY FIG. 7 | MAXIMUM ANNUAL TRAVELING DISTANCE SAMPLE AVERAGE HISTOGRAM..... 22

46 SUPPLEMENTARY FIG. 8 | MINIMUM REBOUND-ADJUSTED ANNUAL TRAVELING DISTANCE SAMPLE AVERAGE HISTOGRAM. .... 23

47 SUPPLEMENTARY FIG. 9 | AVERAGE REBOUND-ADJUSTED ANNUAL TRAVELING DISTANCE SAMPLE AVERAGE HISTOGRAM..... 24

48 SUPPLEMENTARY FIG. 10 | MAXIMUM REBOUND-ADJUSTED ANNUAL TRAVELING DISTANCE SAMPLE AVERAGE HISTOGRAM..... 25

49 SUPPLEMENTARY FIG. 11 | BREAKDOWN OF LIFE CYCLE EMISSIONS..... 43

50

51

52

53

54

55

56

57

58

59

60

61 LIST OF TABLES

62 **SUPPLEMENTARY TABLE 1 | LEVELS OF VEHICLE AUTOMATION** ..... 6

63 **SUPPLEMENTARY TABLE 2 | AUTONOMOUS VEHICLE COMPONENTS** ..... 7

64 **SUPPLEMENTARY TABLE 3 | AUTONOMOUS VEHICLES MATERIAL COMPOSITION** ..... 7

65 **SUPPLEMENTARY TABLE 4 | DEMOGRAPHICS OF THE RESPONDENTS** ..... 8

66 **SUPPLEMENTARY TABLE 5 SUMMARY OF ANNUAL TRAVELING DISTANCES**..... 19

67 **SUPPLEMENTARY TABLE 6 | GENERALIZED LINEAR MODELS RESULTS**..... 27

68 **SUPPLEMENTARY TABLE 7 | AUTONOMOUS VEHICLES PROPOSED BENEFITS SUMMARY**..... 28

69 **SUPPLEMENTARY TABLE 8 | AUTONOMOUS VEHICLES ADOPTION CONCERNS SUMMARY**..... 28

70 **SUPPLEMENTARY TABLE 9 | AUTONOMOUS VEHICLE COMPONENTS MANUFACTURING CHECKLIST** ..... 31

71 **SUPPLEMENTARY TABLE 10 | AUTONOMOUS VEHICLE COMPONENTS SPECIFICATIONS & COSTS** ..... 32

72 **SUPPLEMENTARY TABLE 11 | AUTONOMOUS VEHICLE COMPONENTS SPECIFICATIONS & COSTS REFERENCE**..... 33

73 **SUPPLEMENTARY TABLE 12 | MONTE CARLO SIMULATION PARAMETERS FOR GIVEN SCENARIOS** ..... 40

74 **SUPPLEMENTARY TABLE 13 | MONTE CARLO SIMULATION RESULTS**..... 41

75 **SUPPLEMENTARY TABLE 14 | MANUFACTURING, OPERATION, AND END-OF-LIFE PHASES COST COMBINATIONS SUMMARY**..... 43

76

77 1. Abbreviations

|    |       |                                     |
|----|-------|-------------------------------------|
| 78 | AV    | Autonomous Vehicle                  |
| 79 | ICV   | Internal Combustion Engine          |
| 80 | CO2   | Carbon Dioxide                      |
| 81 | SAV   | Shared Autonomous Vehicle           |
| 82 | PV    | Photovoltaics                       |
| 83 | LCA   | Life Cycle Assessment               |
| 84 | A-BEV | Autonomous Battery Electric Vehicle |
| 85 | CLD   | Causal Loop Diagramming             |
| 86 | SAEV  | Shared Autonomous Electric Vehicle  |
| 87 | MRIO  | Multi-Region Input-Output           |
| 88 | CH4   | Methane                             |
| 89 | N2O   | Nitrogen Dioxide                    |
| 90 | GWP   | Global Warming Potential            |
| 91 | LIB   | Lithium-Ion Battery                 |

92

93

94 1. Autonomous Vehicles Supplementary Information

95 According to the National Highway Traffic Safety Administration, there are six levels of vehicle automation as shown in  
96 Supplementary Table 1. Level 0 is the minimum level with no autonomy and involves full driver control. On the other hand, level 5 is  
97 the maximum level of autonomy, entails 100% autonomy and does not include any driver contribution. It is also referred to as a fully  
98 autonomous vehicle.

99 **Supplementary Table 1 | Levels of Vehicle Automation (NHTSA)** <sup>1</sup>. This table briefly summarizes the levels on autonomy and what  
100 tasks are automated within each autonomy level.

| Level of vehicle automation | Description                                                                                                                                                                                                                                                                                                                             |
|-----------------------------|-----------------------------------------------------------------------------------------------------------------------------------------------------------------------------------------------------------------------------------------------------------------------------------------------------------------------------------------|
| Zero                        | The human driver does all the driving.                                                                                                                                                                                                                                                                                                  |
| One                         | An advanced driver assistance system (ADAS) on the vehicle can sometimes assist the human driver with either steering or braking/accelerating, but not both simultaneously.                                                                                                                                                             |
| Two                         | An advanced driver assistance system (ADAS) on the vehicle can control both steering and braking/accelerating simultaneously under some circumstances. The human driver must continue to pay full attention ("always monitor the driving environment") and perform the rest of the driving task.                                        |
| Three                       | An automated driving system (ADS) on the vehicle can perform all aspects of the driving task under some circumstances. In those circumstances, the human driver must be ready to take back control at any time when the ADS requests the human driver to do so. In all other circumstances, the human driver performs the driving task. |
| Four                        | An automated driving system (ADS) on the vehicle can perform all driving tasks and monitor the driving environment to do all the driving – in certain circumstances. Humans need not pay attention in those circumstances.                                                                                                              |
| Five                        | An automated driving system (ADS) on the vehicle can do all the driving in all circumstances. The human occupants are just passengers and need never be involved in driving.                                                                                                                                                            |

101

102 Autonomous vehicles require four types of inputs for commuting: location, perception, prediction, and planning <sup>2</sup>. Starting with  
103 location, Sensors must be physically compatible with the vehicle's location on the map concerning nearby objects. For perception,  
104 Sensors must be able to detect a wide range of objects, including traffic signals and various forms and colors of signs. Other vehicles,  
105 people, animals, and lane markings are also revealed. For prediction, Algorithms for advanced engineering and machine learning systems  
106 examine all data to conclude what is the best decision to make in terms of accelerating, decelerating, or any other necessary action.  
107 Finally, for planning, the autonomous vehicle system must build on the inputs and utilize behavior prediction software to figure out

108 what the vehicle will do next by considering all the previously listed sorts of data. Autonomous vehicles require distinct components to  
 109 commute, those components are shown in Supplementary Table 2.

110 **Supplementary Table 2 | Autonomous vehicle components.** This table summarizes components within autonomous system and  
 111 what purpose each components takes within the automation of driving.

| Autonomous system component                | Description                                                                                                                                                                                                                                                                                                                                                                                                                                                                                                                                                                                                                                                                                                                                                                                                                                                                 |
|--------------------------------------------|-----------------------------------------------------------------------------------------------------------------------------------------------------------------------------------------------------------------------------------------------------------------------------------------------------------------------------------------------------------------------------------------------------------------------------------------------------------------------------------------------------------------------------------------------------------------------------------------------------------------------------------------------------------------------------------------------------------------------------------------------------------------------------------------------------------------------------------------------------------------------------|
| Light Detection and Ranging (LIDAR)        | estimates the distance between the sensor and other objects, and it employs light beams (millions of laser pulses per second). The time it takes for light to reflect off a surface and return is measured by LIDAR. Based on the distance they can measure, there are three varieties of LIDAR for autonomous vehicles: short, mid, and long-range depending on how far objects can be detected                                                                                                                                                                                                                                                                                                                                                                                                                                                                            |
| Ultrasonic Sensors                         | Ultrasonic sensors fitted on the vehicle offer information about items in the immediate vicinity. This sort of information is widely used in parking assistance, backup alarms, and blind-spot detection systems                                                                                                                                                                                                                                                                                                                                                                                                                                                                                                                                                                                                                                                            |
| Infrared Sensors                           | Infrared sensors detect lane lines, people, bicycles, and other objects that other sensors may struggle to detect in low light (at night) or specific scenarios (weather conditions such as rain)                                                                                                                                                                                                                                                                                                                                                                                                                                                                                                                                                                                                                                                                           |
| Cameras                                    | The vehicle's cameras detect both moving and stationary objects                                                                                                                                                                                                                                                                                                                                                                                                                                                                                                                                                                                                                                                                                                                                                                                                             |
| Radio Detection and Ranging (RADAR)        | A sensor that measures the distance between obstacles and the sensor using radio waves.                                                                                                                                                                                                                                                                                                                                                                                                                                                                                                                                                                                                                                                                                                                                                                                     |
| Software and Central Processing Unit (CPU) | Deep learning, sensor fusion, and surround vision are all combined in software & CPU. Other integrated functions include:<br><br>A- Global Positioning System (GPS): GPS triangulates a vehicle's location using satellites. One useful definition is Inertial Navigation Systems (INS), which use gyroscopes and accelerometers to determine a vehicle's location, orientation, and velocity. INS and GPS are frequently combined to increase accuracy.<br><br>B- Prebuilt Maps: When utilizing GPS and INS, these are utilized to correct location mistakes.<br><br>C- Dedicated Short-Range Communication (DSRC): a wireless communication system that allows automobiles to connect and other road users <sup>3</sup> .<br><br>D- Vehicle to Everything (V2X) It also aids drivers in recognizing possible risks ahead, even if their vision is impaired <sup>4</sup> . |
| Adaptive Cruise Control (ACC)              | a system that is controlled by the autonomous vehicle system to automatically adjust the vehicle's speed based on the speed of the vehicle in front of it.                                                                                                                                                                                                                                                                                                                                                                                                                                                                                                                                                                                                                                                                                                                  |

112 5-8

113

114

115 **Supplementary Table 3 | Autonomous vehicles' material composition (Per vehicle).** This table summarizes the material composition  
 116 for each vehicle brand considered in this study.

| Reference name | Iron ores (Kg) | Copper ores (Kg) | Nickel Ores (Kg) | Aluminum ores (Kg) | Glass (Kg) | Plastic (Kg) | Cobalt (Kg) | Manganese (Kg) | Magnesium (Kg) |
|----------------|----------------|------------------|------------------|--------------------|------------|--------------|-------------|----------------|----------------|
| China          | 372            | 129              | 56               | 393                | 49         | 653          | 19          | 19             | 6              |

|           |     |     |    |     |    |     |    |    |   |
|-----------|-----|-----|----|-----|----|-----|----|----|---|
| Japan 1   | 501 | 173 | 71 | 525 | 65 | 766 | 24 | 24 | 8 |
| Japan 2   | 384 | 135 | 63 | 409 | 51 | 587 | 21 | 21 | 6 |
| India     | 350 | 117 | 37 | 356 | 45 | 535 | 12 | 12 | 6 |
| Korea     | 500 | 169 | 60 | 514 | 65 | 765 | 20 | 20 | 8 |
| US 1      | 528 | 188 | 94 | 568 | 70 | 807 | 31 | 31 | 8 |
| US 2      | 480 | 169 | 80 | 512 | 63 | 734 | 27 | 27 | 8 |
| Mexico    | 171 | 59  | 25 | 180 | 23 | 262 | 8  | 8  | 3 |
| Germany 1 | 491 | 166 | 58 | 504 | 63 | 752 | 19 | 19 | 8 |
| Germany 2 | 531 | 185 | 82 | 561 | 70 | 812 | 27 | 27 | 9 |
| Turkey    | 426 | 155 | 87 | 467 | 57 | 650 | 29 | 29 | 7 |
| France    | 394 | 136 | 57 | 414 | 52 | 603 | 19 | 19 | 6 |

117

118

119

## 2. Survey Results

120

121

**Supplementary Table 4 | Demographics of the respondents.** This table shows the demographic characteristic, and categories, frequency and percentage of each category in the sample n=330 samples

122

| Demographic Characteristic | Category                | Frequency | Percentage (%) |
|----------------------------|-------------------------|-----------|----------------|
| Age group                  | 18 to 19                | 9         | 2.7            |
|                            | 20 to 24                | 55        | 16.7           |
|                            | 25 to 29                | 38        | 11.5           |
|                            | 30 to 34                | 44        | 13.3           |
|                            | 35 to 39                | 48        | 14.5           |
|                            | 40 to 44                | 49        | 14.8           |
|                            | 45 to 49                | 35        | 10.6           |
|                            | 50 to 54                | 33        | 10.0           |
|                            | 55 to 59                | 15        | 4.5            |
|                            | 60+                     | 4         | 1.2            |
| Marital status             | Single                  | 108       | 32.7           |
|                            | Married                 | 85        | 25.8           |
|                            | Married with children   | 137       | 41.5           |
| Employment                 | Full-time employee      | 261       | 79.1           |
|                            | Part-time employee      | 22        | 6.7            |
|                            | Student                 | 39        | 11.8           |
|                            | other                   | 8         | 2.4            |
| Education level            | High school             | 26        | 7.9            |
|                            | Diploma                 | 27        | 8.2            |
|                            | Bachelor's              | 178       | 53.9           |
|                            | Graduate (Master's/PhD) | 99        | 30.0           |
|                            | Less than 20,000        | 206       | 62.4           |



|                                               |                  |     |      |
|-----------------------------------------------|------------------|-----|------|
| Income level (QAR)                            | 20,000 to 40,000 | 81  | 24.5 |
|                                               | Over 40,000      | 43  | 13.0 |
| Individuals of 18 years or older in household | 1 to 2           | 154 | 46.7 |
|                                               | 3 to 4           | 91  | 27.6 |
|                                               | 5 and over       | 85  | 25.8 |
|                                               | 0                | 14  | 4.2  |
| Cars in Household                             | 1 to 2           | 195 | 59.1 |
|                                               | 3 to 4           | 83  | 25.2 |
|                                               | Over 4           | 38  | 11.5 |
|                                               | 0                | 12  | 3.6  |
| Driving experience (years)                    | 1 to 2           | 15  | 4.5  |
|                                               | 3 to 5           | 38  | 11.5 |
|                                               | 6 to 10          | 77  | 23.3 |
|                                               | Over 10          | 188 | 57.0 |
| Vehicle's ownership                           | Yes              | 290 | 87.9 |
|                                               | No               | 40  | 12.1 |

123

124

125

126

127

128

129

130

131

132 (a)

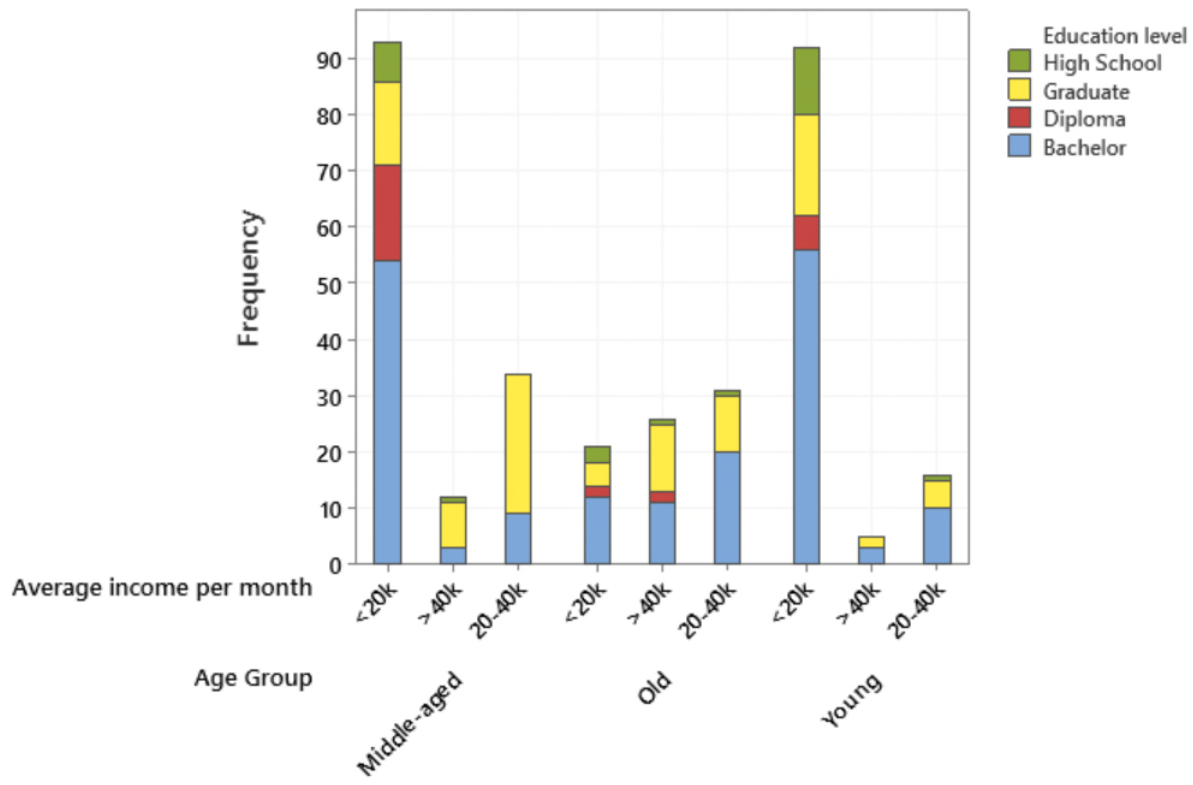

133

134

135

136

137

138

139

140 (b)

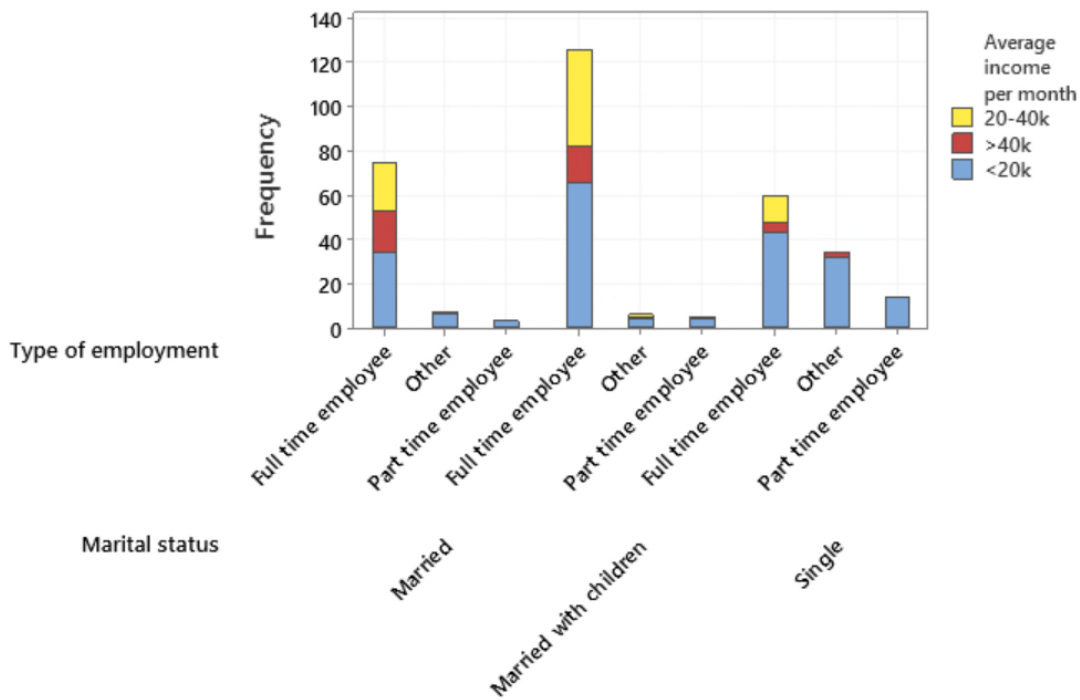

141

142 **Supplementary Figure 1 | Cluster bar charts for covariate demographic characteristics of respondents.** a, Cluster bar chart for age, education and  
 143 average income of respondents. b, Cluster bar chart for marital status, type of employment and average income of respondents. This figure examines covariance  
 144 between the different demographics among the respondents.

145

146

147

148

149

150

151 The following list provides the questions asked to the respondents and the choices whether they were provided with each question:

152 **Section 1: Demographics**

153 1. Age?

154 2. Marital status ? (Married with children, Married or Single)

155 3. Type of employment? (Full-time employee, Part-time employee, Student, Unemployed, Housewife, or Other)

156 4. Highest education level? (High school or less, Diploma degree, Bachelor's degree or Graduate (Masters or PhD))

157 5. Average income per month? (< 5,000 QR, 5,000-10,000 QR, 10,000-20,000 QR, 20,000-40,000 QR, or More than 40,000 QR)

158 6. Number of individuals (including yourself) above 18 years old in your household?

159 7. Total number of cars in your household?

160

161 **Section 2: Commuting behavior**

162 1. Number of years of driving experience?

163 2. Do you own a car? (Yes or no)

164 3. Average traveled distance per year? (<10,000 KM, 10,000- 20,000 KM, 21,000- 30,000 KM, 31,000- 40,000 KM, or >40,000  
165 KM)

166 4. How Much you are willing to pay to buy a new car? (20,000- 40,000 QR, 40,000- 80,000 QR, 80,000- 160,000QR, 160,000-  
167 320,000QR or more than 320,000 QR)

168 5. For what purpose do you travel most by car (work, shopping, social, escort)?

169 6. On average how many kilometers do you travel per work trip? (5, 10, 15, 20, 25, 30, or not applicable)

170 7. On average what is the total travel time per day that you commute from home to work (only answer if you use a private car otherwise  
171 skip this question)? (Less than 10 min, 10-20min, 21-30min, 31-40min, or more than 40min)

172 8. What mode of travel do you mainly use for daily commute? (Bicycle, Bus, Metro, Private car (Driver), Private car (Passenger), Taxi,  
173 or walk)

174 **Section 3: Autonomous vehicles**

175 1. How much did you know about AV? (First time I heard about it, A simple background from (social media, newspaper, or the internet),  
176 A good background (knowing some of its properties), or a strong background (knowing what kind of technology is used in AV))

177 2. Select one statement representing your perception of the safety of AV:

178 A- Generally, AVs are safe, but I have a minor concern that something could go wrong

179 B- I am opposed to using AV unless I can override the control manually

180 C- I have no concerns about AV safety

181 D- I need to know a lot about AVs and their safety performce

182 E- I think AVs are not safe and should not be allowed

183 2. Introducing AV will reduce the congestion on the roadways. (Strongly disagree, Disagree, Neutral, Agree or strongly disagree)

184 3. Introducing AV will reduce fuel consumption. (Strongly disagree, Disagree, Neutral, Agree or strongly disagree)

185 4. Introducing AV will reduce travel time. (Strongly disagree, Disagree, Neutral, Agree or strongly disagree)

186 5. Introducing AV will reduce parking costs. (Strongly disagree, Disagree, Neutral, Agree or strongly disagree)

187 6. AV can encourage me to travel on long-distance trips more often. (Strongly disagree, Disagree, Neutral, Agree or strongly disagree)

188 7. AV can allow me to visit places that I find difficult to reach through a regular car. (Strongly disagree, Disagree, Neutral, Agree or  
189 strongly disagree)

190 8. AV can make my travel more comfortable. (Strongly disagree, Disagree, Neutral, Agree or strongly disagree)

191 9. AV can eliminate human errors causing vehicle accidents. (Strongly disagree, Disagree, Neutral, Agree or strongly disagree)

192 10. I have concerns about securing the autonomous driving system from computer hackers. (Strongly disagree, Disagree, Neutral, Agree  
193 or strongly disagree)

- 194 11. I have concerns about the possibility of accidents between regular cars and autonomous vehicles. (Strongly disagree, Disagree,  
195 Neutral, Agree or strongly disagree)
- 196 12. I have concerns about the increase in maintenance cost in terms of (updating the computer system of the AVs and changing  
197 equipment's costs). (Strongly disagree, Disagree, Neutral, Agree or strongly disagree)
- 198 13. I have concerns about the performance of autonomous vehicles in harsh environmental conditions (such as during rainy weather  
199 conditions) (Strongly disagree, Disagree, Neutral, Agree or strongly disagree)
- 200 14. Would you switch to using an autonomous vehicle if both regular and autonomous vehicles have the same travel time and travel  
201 cost? (Yes or no)
- 202 15. If you don't own a driver's license yet, or not able to drive (elderly/person with a disability), or currently use another mode choice  
203 such as (public transport or taxi) would you switch to use autonomous vehicles? (Yes or no)
- 204 16. If you own an autonomous vehicle, how would your travel distance change have compared to your current travel patterns? (No  
205 change, Slight increase (10-20% more), Slight increase in distance (10-20% more), Moderate increase (20-50% more in distance),  
206 Moderate increase in distance (20-50% more ), Considerable increase (50%-100%), Considerable increase in distance (50%-100%),  
207 Significant increase (at least 2 times more), Significant increase in distance (at least 2 times more))

208

209

210

211

212

213

214

215

216

217 2.1 Annual Travelling Distances Analysis

218

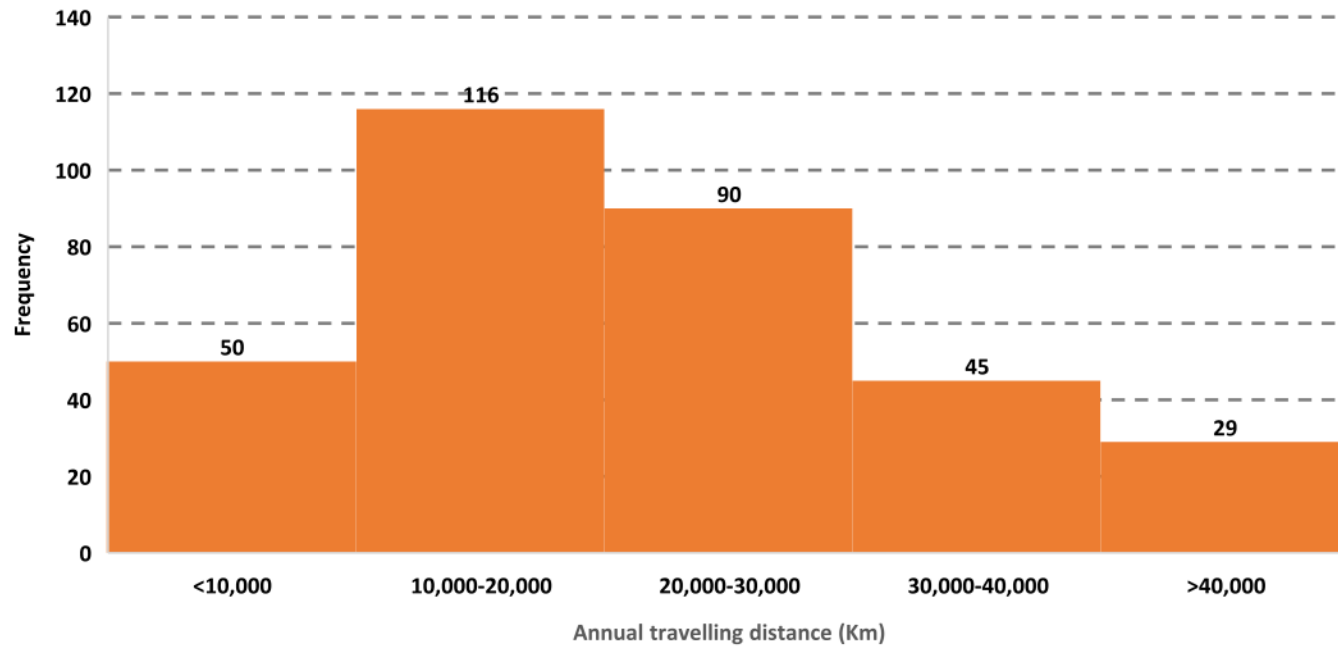

219

220 **Supplementary Fig. 2 | Histogram of annual traveling distance.** n=330 samples. This figure highlights how the respondents are  
221 distributed among annual traveling distance categories.

222

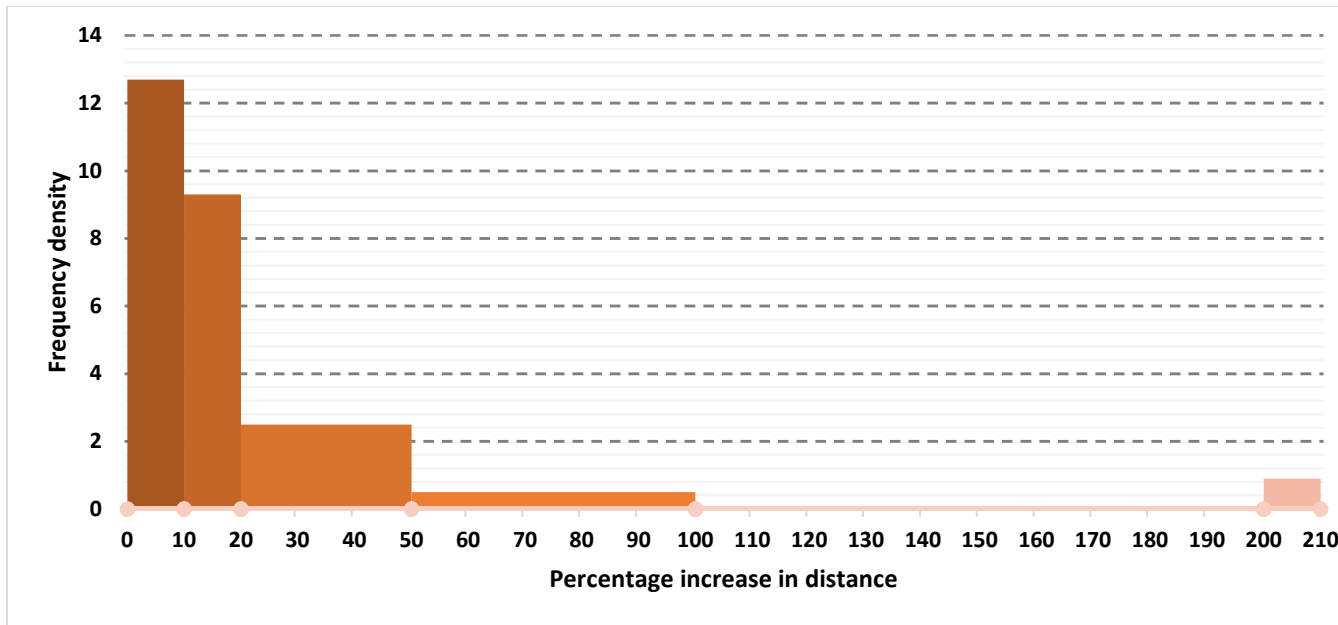

223

224

**Supplementary Fig. 3 | Histogram of rebound effect.** n=330 samples. This figure highlights how the respondents are distributed among rebound effect categories.

225

226

227

The annual rebound-adjusted traveling distance is calculated on three levels as follows:

228

- 1- Minimum rebound-adjusted annual traveling distance (MiRAATD): derived from multiplying the lower bound (LB) of the annual traveling distance and lower bound of rebound effect as follows in equation (1):

229

230

$$MiRAATD = (ATD)_{LB} \times (RE)_{LB} \quad (1)$$

231

232

Where ATD: Annual traveling distance; RE: Rebound effect

233

- 2- Average rebound-adjusted annual traveling distance (ARAATD): obtained using average annual traveling distance and average rebound effect in  $ARAATD = (ATD)_{Avg} \times (RE)_{Avg}$

234

235

(2)

).



236  $ARAATD = (ATD)_{Avg} \times (RE)_{Avg}$  (2)  
 237

238 3- Maximum rebound-adjusted annual traveling distance (MRAATD): results of multiplication of the Upper bound (UB) of the  
 239 Annual traveling distance and the Upper bound of the rebound effect as highlighted in equation (3).

240  
 241  $MRAATD = (ATD)_{UB} \times (RE)_{UB}$  (3)

242  
 243 Due to the limited amount of data points of 330, Bootstrapping was done on the three sets of minimum, average, and maximum  
 244 rebound-adjusted annual traveling distances by using sampling with replacement. Bootstrapping involved resampling a single dataset to  
 245 produce a massive number of simulated samples. For each of the three sets, 330 values of rebound-adjusted annual traveling distances  
 246 are sampled with replacement from the original rebound-adjusted annual traveling distance sets of 330 values each. The generated 330  
 247 values form one sample. Then, the average of the generated sample was calculated. This procedure was repeated to generate 10,000  
 248 sample averages using Python. **Error! Reference source not found.** Supplementary Supplementary Fig. 4 summarizes our  
 249 bootstrapping results shown within a box and whisker plot. These three sets are of vital importance due to their use in estimating the  
 250 rebound effect as well as estimating service life for autonomous vehicles. Furthermore, the bootstrapping procedure was also done on  
 251 the original minimum, average, and maximum annual traveling distances to estimate the service life of battery electric vehicles. Then,  
 252 the difference in the service life between autonomous and non-autonomous vehicles is used to estimate a percentage decrease in service  
 253 life due to the rebound effect. This percentage represents the rebound effect which is calculated as in  $RE =$   
 254  $\left( \frac{MVM}{GATDSA} \right) - MVMGRAATDSAMVMGATDSA$   
 255  $\square$  (4).

256

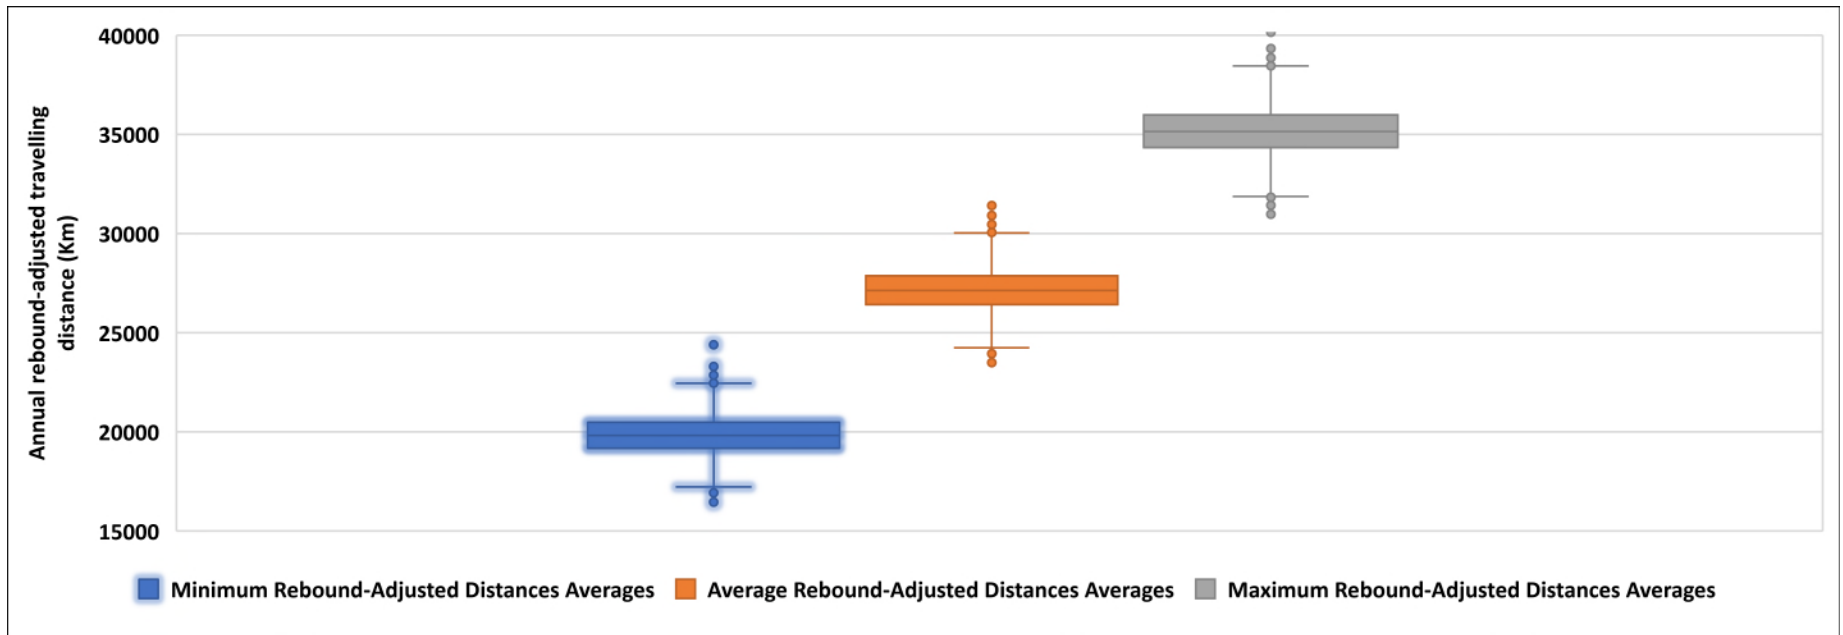

257

258 **Supplementary Fig. 4| Minimum, average, and maximum annual rebound-adjusted traveling distances after bootstrapping.** Box  
 259 plots descriptive statistics are termed as follows: Minimum→ Min, Maximum→ Max, 1<sup>st</sup> quartile→1Q, 3<sup>rd</sup> quartile→ 3Q, Interquartile  
 260 range→ IQR, Lower whisker→ LW, Upper whisker→ UW. For Minimum rebound-adjusted distances averages: Min=16459, Max=  
 261 24386, 1Q= 19179, 3Q= 20486, IQR= 1307, LW= 17219, UW= 22447. For Average rebound-adjusted distances averages: Min=  
 262 23494, Max= 31690, 1Q= 26416, 3Q= 27866, IQR= 1449, LW= 24243, UW= 30039. For Maximum rebound-adjusted distances  
 263 averages: Min= 30967, Max= 40605, 1Q= 34334, 3Q= 35982, IQR= 1647, LW= 31863, UW= 38453

264

$$265 \quad RE = \frac{\left( \frac{MVM}{GATDSA} \right) - \left( \frac{MVM}{GRAATDSA} \right)}{\left( \frac{MVM}{GATDSA} \right)} \quad (4)$$

266 Where RE: Rebound effect; MVM: maximum vehicle milage (assumed to be 300,000 Km); GATDSA: generated annual traveling distances samples  
 267 average; GRAATDSA: generated rebound-adjusted annual traveling distances samples average.

268

269 The following table summarizes the annual traveling distance sets. The minimum, average, and maximum annual traveling  
 270 distances are extracted from the survey, where each reading reflects the participant’s annual traveling distance values. As for minimum,  
 271 average, and maximum annual traveling distance sample averages, they were extracted from carrying the bootstrapping simulation on  
 272 the three original distances sets extracted from the survey. Lastly for minimum, average, and maximum rebound-adjusted annual  
 273 traveling distance sample averages, we took the three original distances set, adjusted them with the rebound effect to reflect the increased  
 274 annual travel due to autonomy, and then applied bootstrapping simulation.

275 **Supplementary Table 5 Summary of annual traveling distances.** This table demonstrates the findings of the traveling distances  
 276 analysis for original 330 point data sets as well as 10,000 samples produced from bootstrapping.

| Distance distribution                                             | n      | Mean   | Standard deviation | Minimum | Median | Maximum |
|-------------------------------------------------------------------|--------|--------|--------------------|---------|--------|---------|
| Minimum annual traveling distance                                 | 330    | 19,836 | 17,496             | 0       | 20,000 | 120,000 |
| Average annual traveling distance                                 | 330    | 27,171 | 19,439             | 5,000   | 25,000 | 135,000 |
| Maximum annual traveling distance                                 | 330    | 35,182 | 21,873             | 10,000  | 30,000 | 150,000 |
| Minimum annual traveling distance sample average                  | 10,000 | 16,570 | 644                | 14,134  | 16,565 | 18,936  |
| Average annual traveling distance sample average                  | 10,000 | 21,576 | 639                | 19,316  | 21,565 | 23,997  |
| Maximum annual traveling distance sample average                  | 10,000 | 26,574 | 640                | 24,407  | 26,565 | 29,027  |
| Minimum rebound-adjusted annual traveling distance sample average | 10,000 | 19,842 | 967                | 16,459  | 19,812 | 24,386  |
| Average rebound-adjusted annual traveling distance sample average | 10,000 | 27,158 | 1076               | 23,494  | 27,130 | 31,690  |
| Maximum rebound-adjusted annual traveling distance sample average | 10,000 | 35,170 | 1218               | 30,967  | 35,146 | 40,605  |

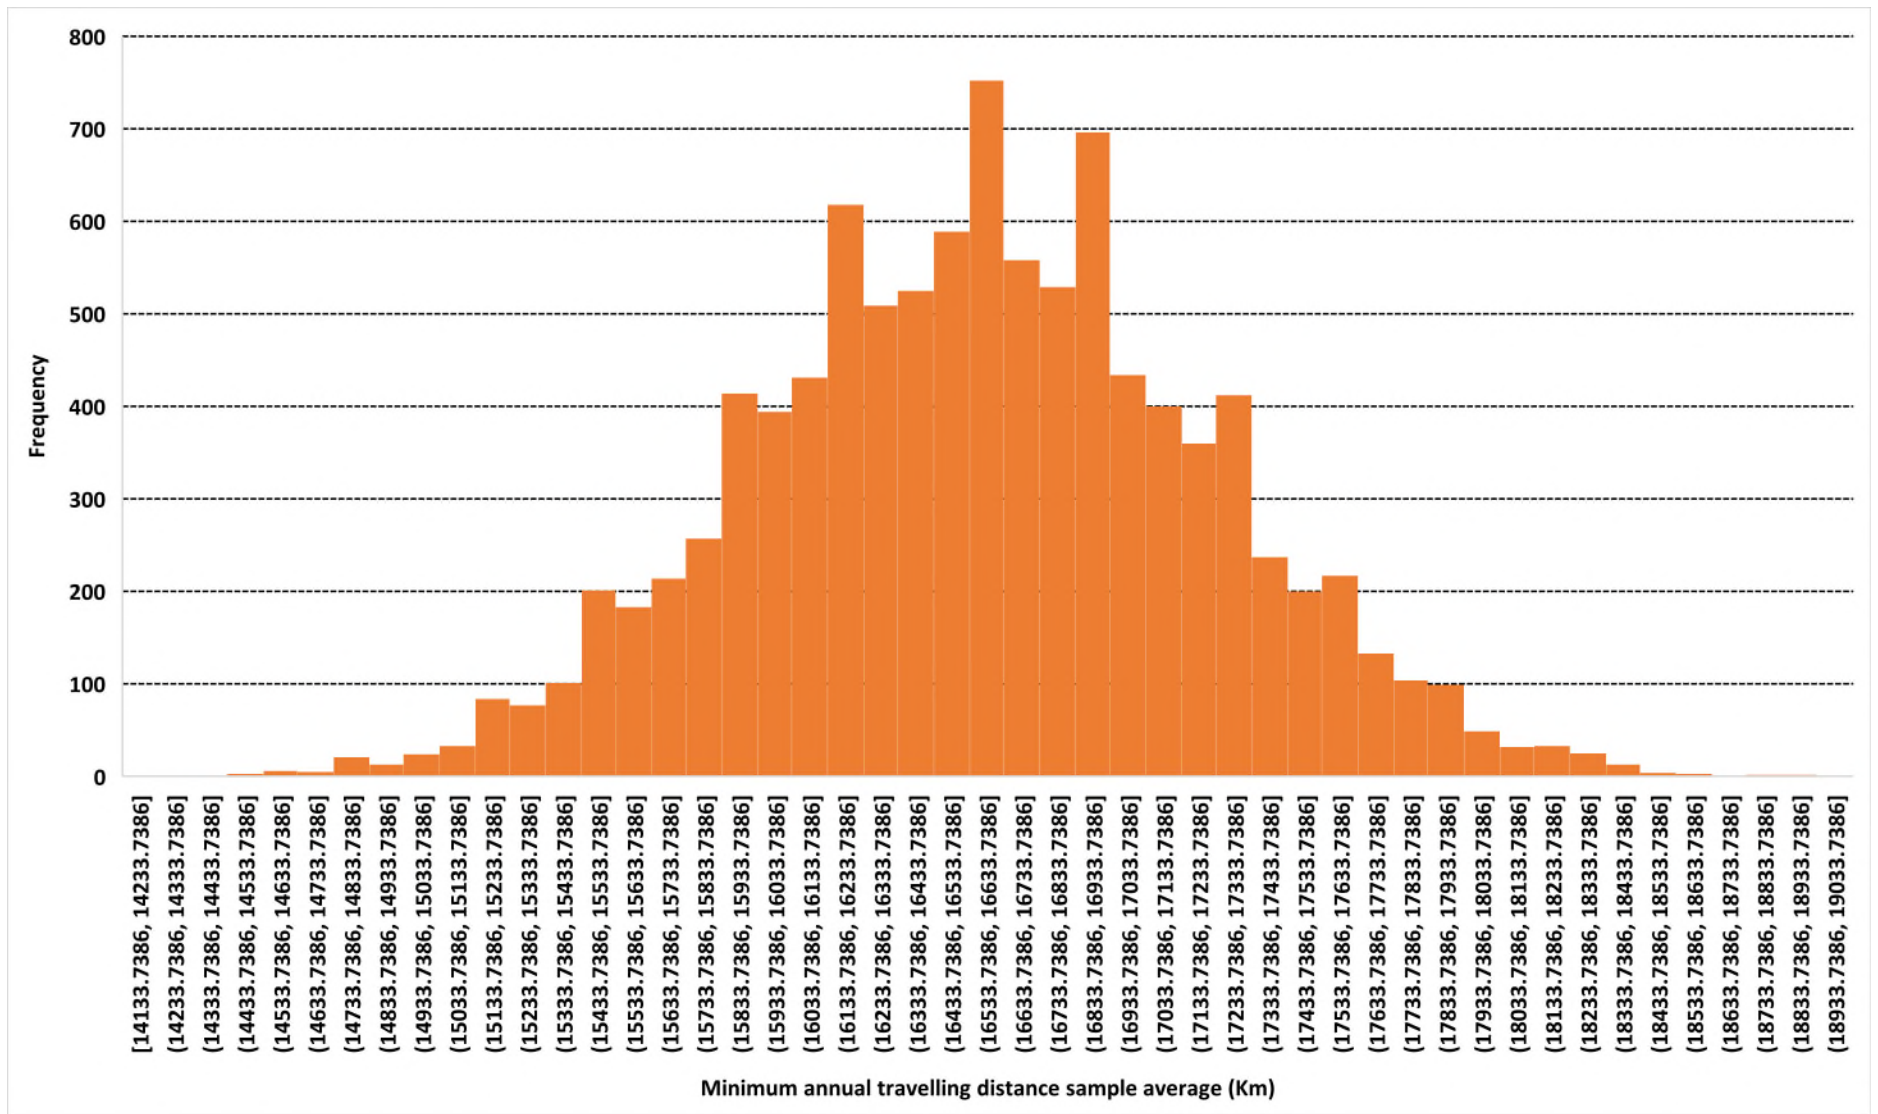

278

279

Supplementary Fig. 5| Minimum annual traveling distance sample average histogram. n=10,000 samples

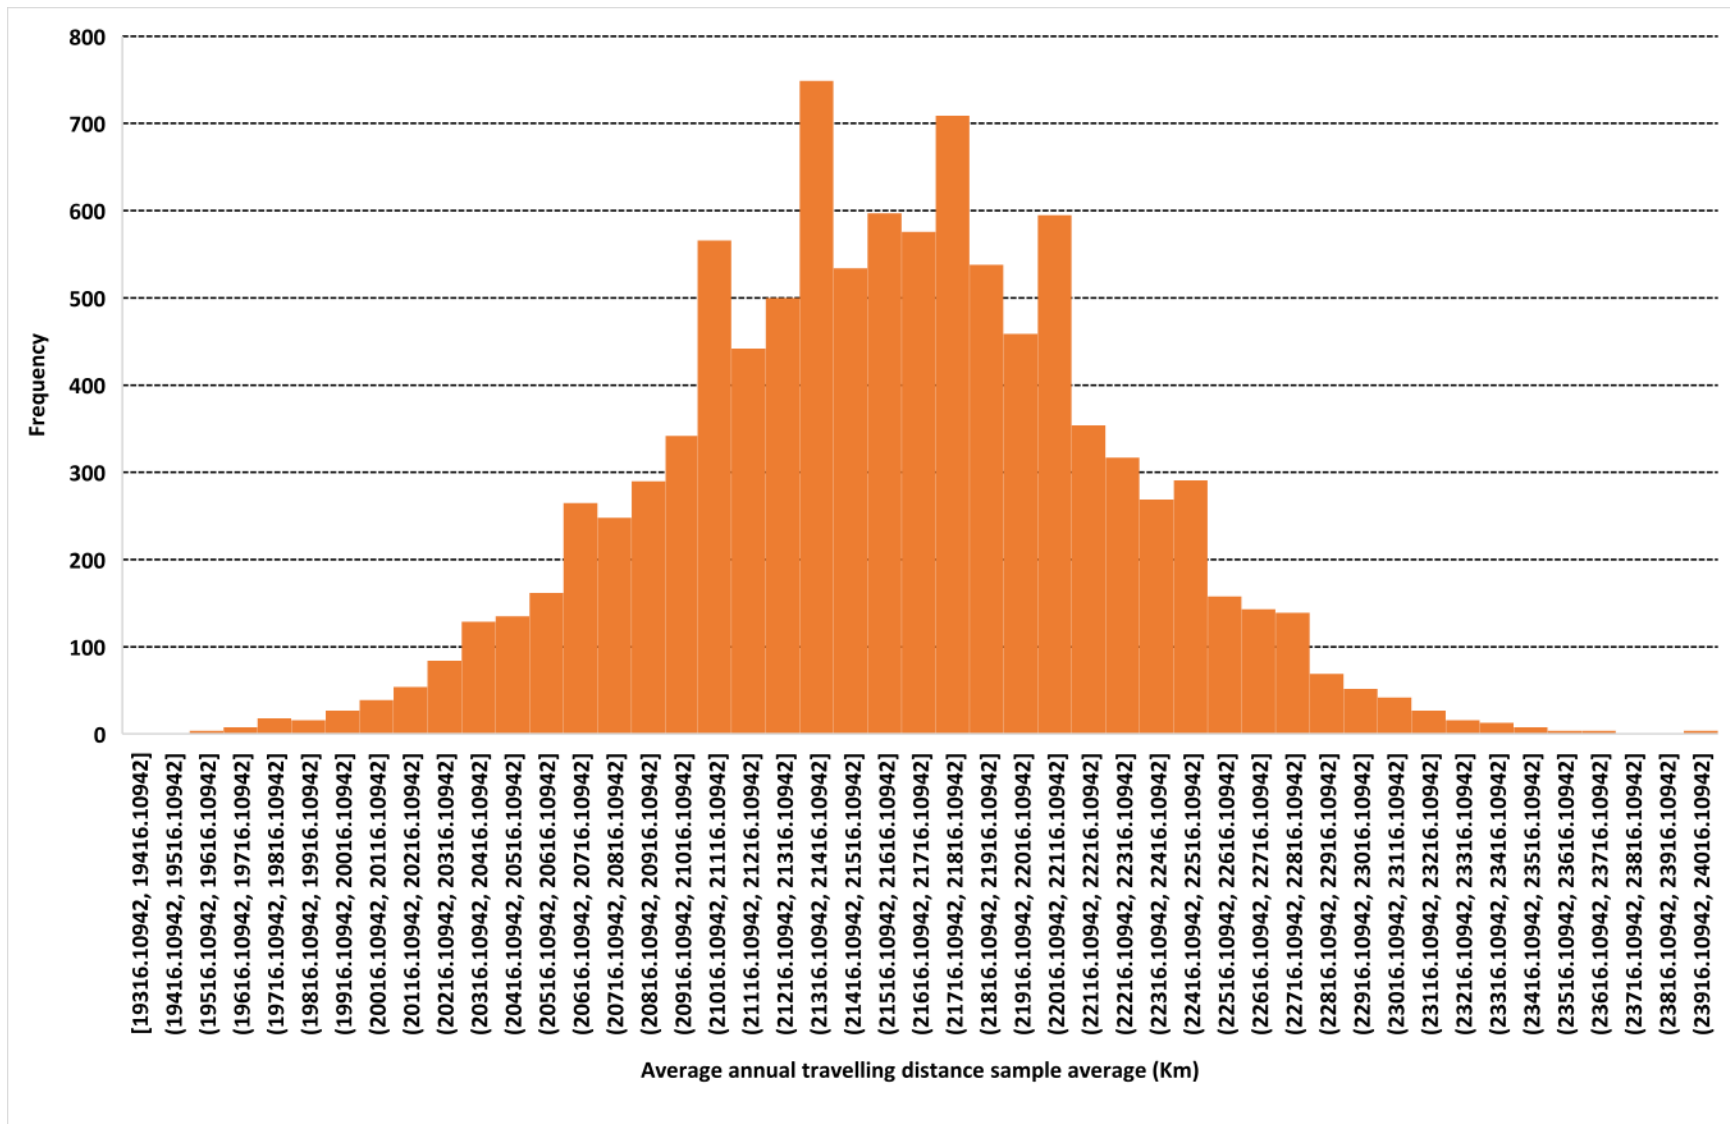

280

281

Supplementary Fig. 6 | Average annual traveling distance sample average histogram. n=10,000 samples

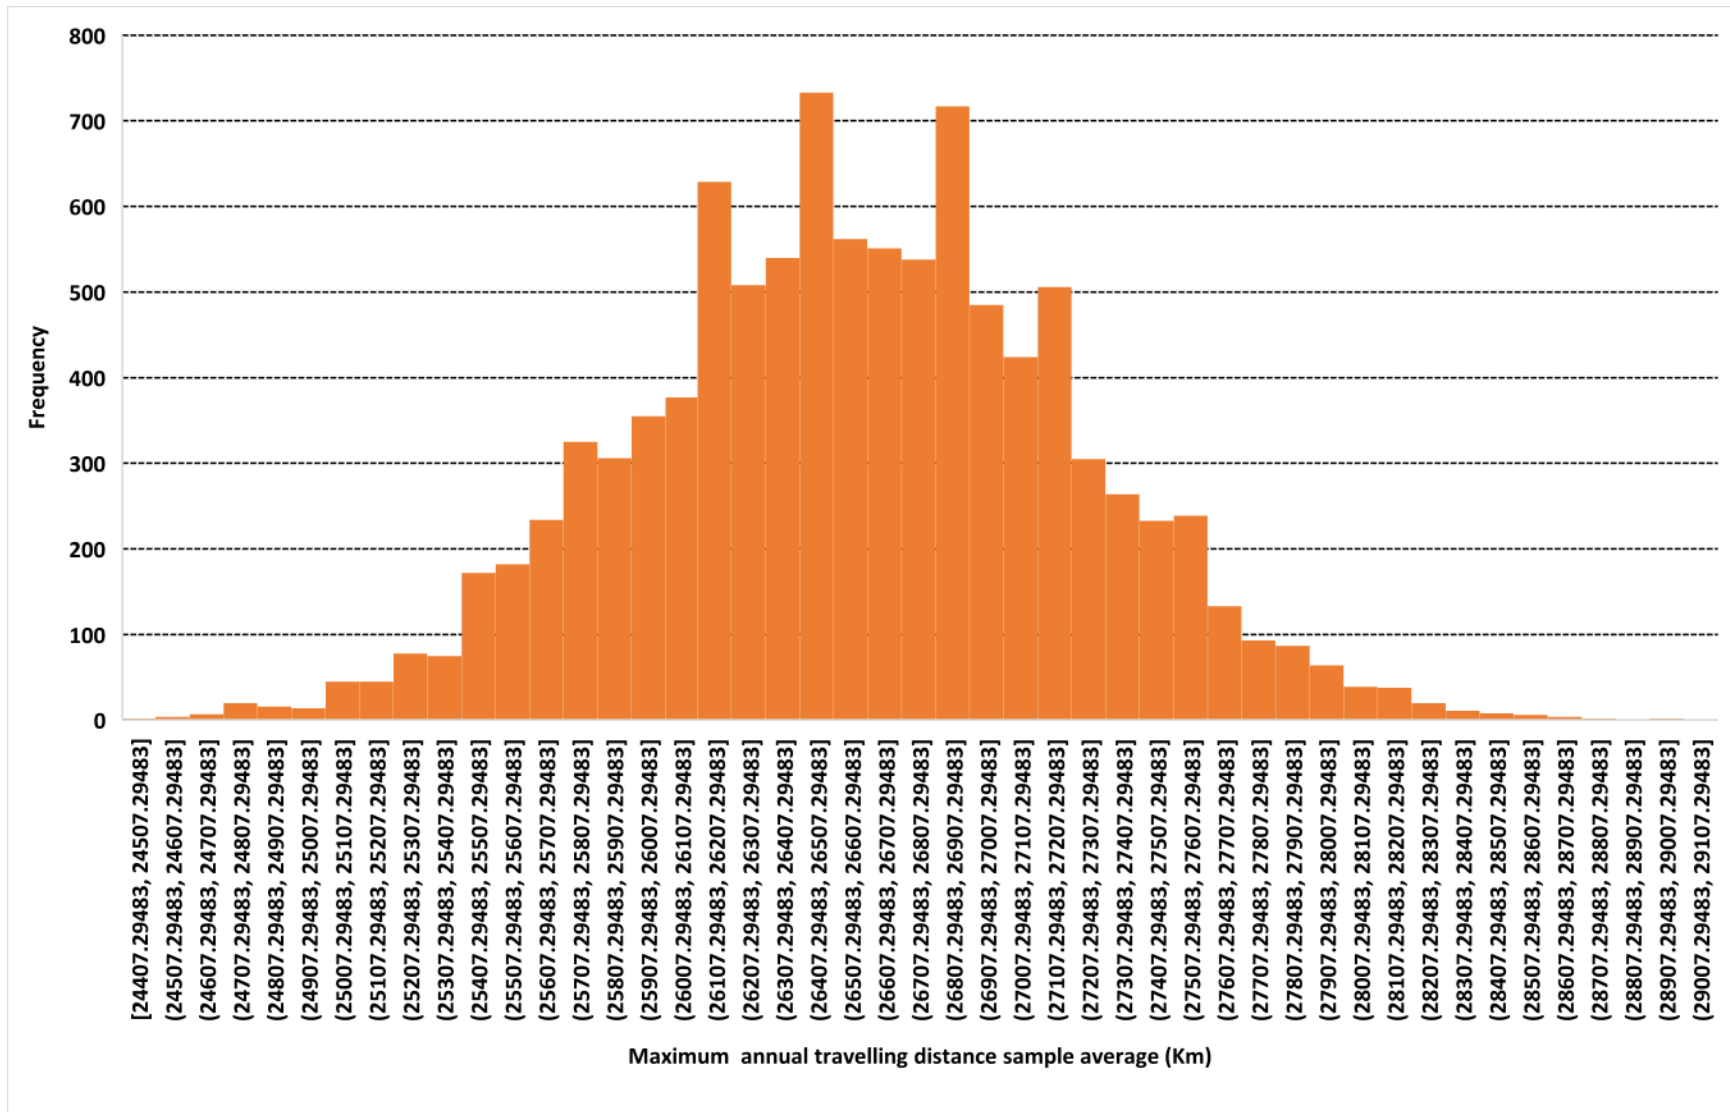

282

283

Supplementary Fig. 7 | Maximum annual traveling distance sample average histogram. n=10,000 samples

284

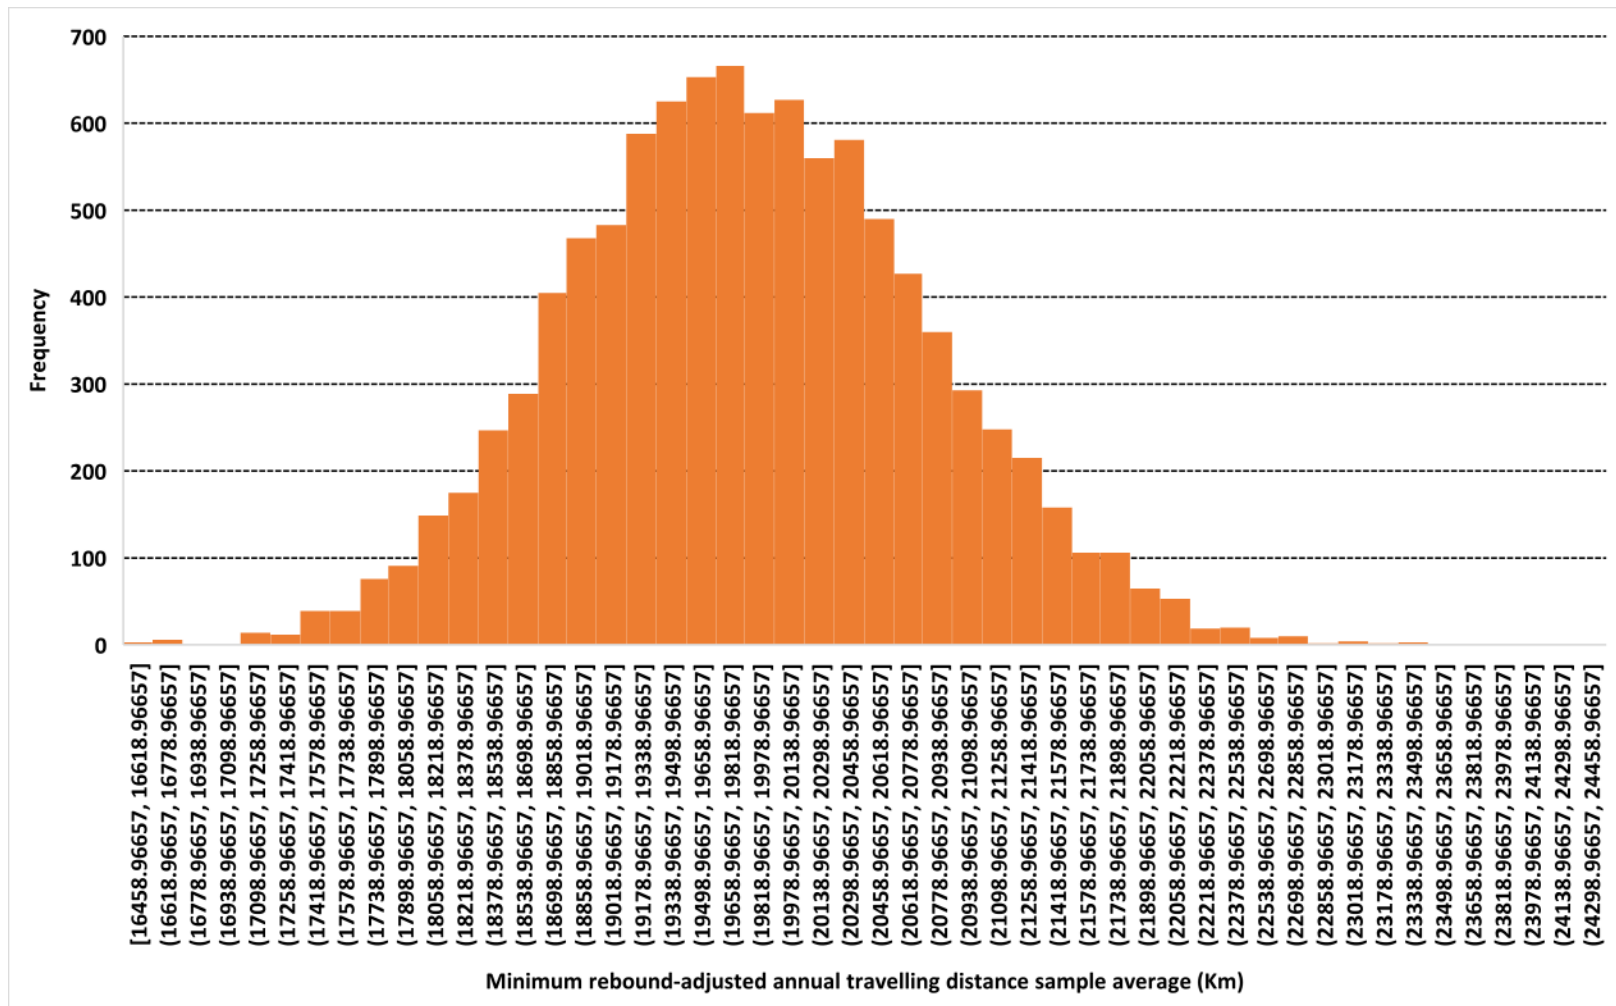

285

286

Supplementary Fig. 8 | Minimum rebound-adjusted annual traveling distance sample average histogram. n=10,000 samples

287



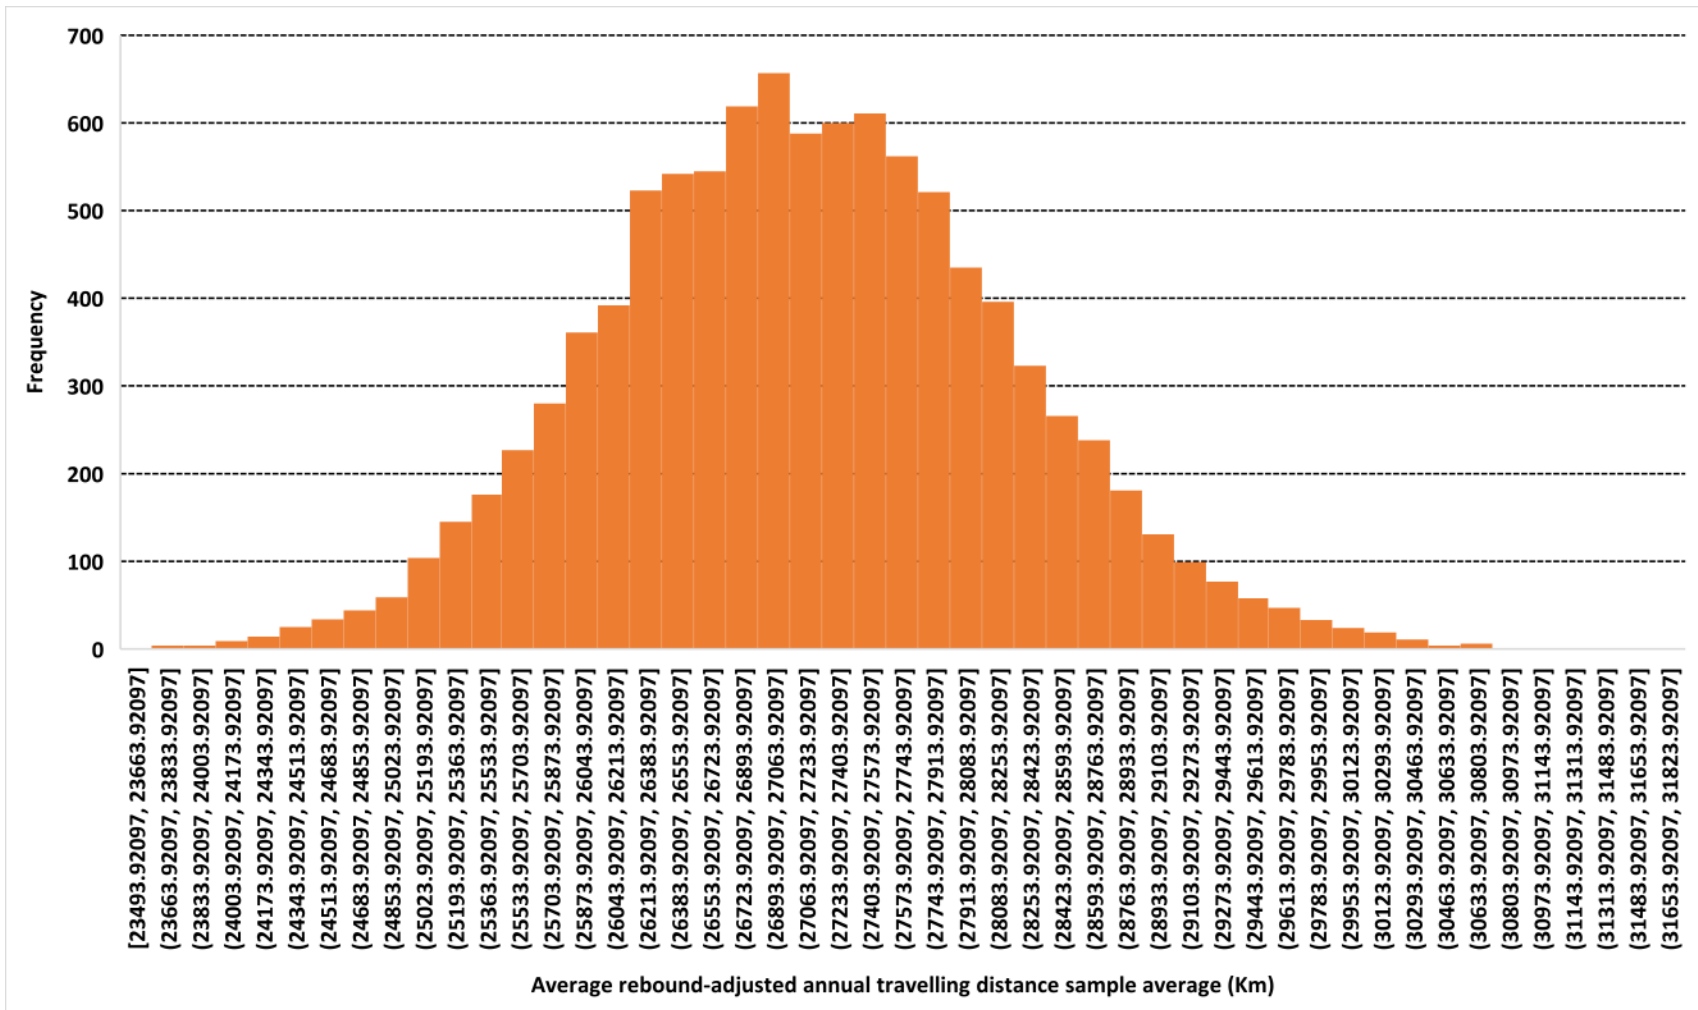

288

289

290

291

Supplementary Fig. 9 | Average rebound-adjusted annual traveling distance sample average histogram. n=10,000 samples



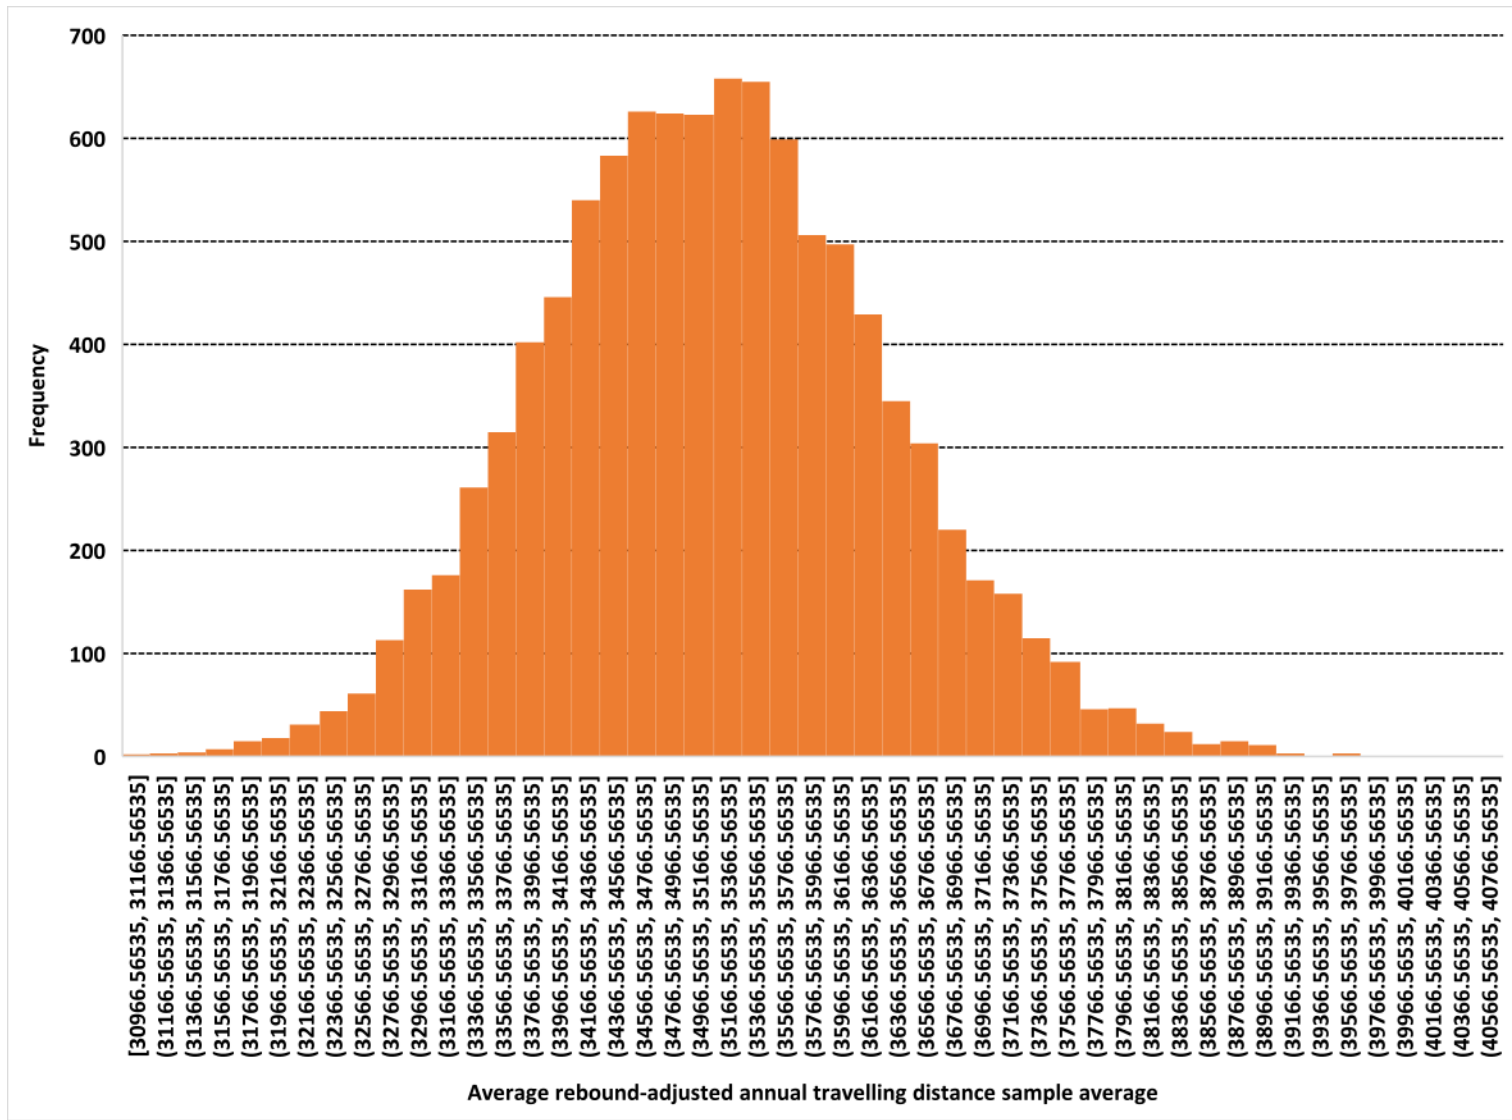

292

293

Supplementary Fig. 10 | Maximum rebound-adjusted annual traveling distance sample average histogram. n=10,000 samples

## 294 2.2 Generalized Linear Models

295

296 The generalized linear model adds a link function to the general linear model that connects the dependent variable to the components  
297 and covariates. Three generalized linear models with a 95% confidence interval are employed to investigate the significant categories  
298 affecting the dependent variables. The dependent variables for the three models are the rebound effect, annual traveling distance, and  
299 autonomous vehicle background knowledge respectively. The three models share the same independent variables including age, marital  
300 status, employment, level of education, income, number of adults per household, number of cars per household, and driving experience.  
301 Supplementary Supplementary Table 6 summarizes our three models' results. Firstly, households 3 to 4 with individuals who are 18  
302 years or older were found to have a significant effect on the rebound effect. In other terms, more crowded households are likely to travel  
303 more when they adopt autonomous vehicles when compared to households with fewer adults. This was demonstrated clearly when the  
304 average rebound-adjusted annual traveling distances set was considered, households with 3 to 4 individuals had the highest average  
305 rebound effect value of 1.234 while 1-2 and 5 and over had average rebound effect values of 1.22 and 1.233 respectively. This value of  
306 1.234 indicates that households with 3 to 4 individuals are anticipated to travel additional distances due to autonomy with an average  
307 value of 23.4% increase relevant to their annual traveling distances. It is noted that this is almost identical to the increase anticipated to  
308 be undergone by crowder households of 5 and over adults.

309 As for the annual traveling distance, both full-time and part-time employees are likely to travel more when compared to other  
310 categories such as students and others which includes housewives and unemployed people. This can be explained by stating that both  
311 categories represent people who must attend their jobs. One other possible explanation would be the climate of Qatar. In a study on this  
312 matter in the period between March 1999 and January 2014 conducted by [39], the daytime means maximum air temperature was over  
313 50 °C in most of the two months with a minimum temperature of over 30°C. The situation of climate in Qatar is exacerbated by the  
314 global warming & climate change. This leads people to prefer to use their cars when compared to public transportation which sometimes  
315 requires people to walk to reach the public transportation stations. Hot climate conditions increase travel demand, thus people with  
316 responsibilities/duties are found to be the first segment of potential early adopters of autonomous vehicles. regarding the bachelor's  
317 degree. Regarding the two driving experience categories of 0. Firstly, the people with no driving experience would represent the category  
318 of people who don't drive at all or have their drivers readily available to transport them. This provided convenience of transportation  
319 could lead to more traveling. Finally, the autonomous vehicles background knowledge model concluded with no significant categories  
320 among the respondents who are more likely to have better background knowledge.

321

322 **Supplementary Table 6 | Generalized linear models results.** 95% confidence interval. A category is considered significant if its  
 323 significance level is < 0.05.

| Model                                   | Significant Categories          | Significance level | The goodness of fit test variable |
|-----------------------------------------|---------------------------------|--------------------|-----------------------------------|
| Rebound Effect                          | Individuals – 3 to 4            | 0.013              | 0.72                              |
| Annual Traveling Distance               | Employment – Full-time employee | 0.027              | 0.785                             |
|                                         | Employment – Part-time employee | 0.031              |                                   |
|                                         | Education – Bachelor's degree   | 0.025              |                                   |
|                                         | Experience – 0 years            | 0.02               |                                   |
| Autonomous Vehicle Background Knowledge | -                               | -                  | 0.789                             |

324

325

326 [2.3 Autonomous Vehicles Adoption Perceptions](#)

327

328 This stage defines a crucial step in autonomous vehicle adoption due to its importance in identifying the public’s opinions about  
 329 autonomous vehicles and what relevant possible concerns are to be addressed properly. Four proposed benefits of autonomous vehicles  
 330 were investigated which include reducing congestion on the roadways, reducing fuel consumption, reducing travel time, and reducing  
 331 parking costs as shown in Supplementary Table 7**Error! Reference source not found.** The most agreed benefit among respondents  
 332 was reducing fuel consumption which had 63.6% positive opinions about it, 22.7% neutral, and 13.7% negative opinions. On the other  
 333 hand, reducing traveling time was the least accepted autonomous vehicle benefit with only 47% positive opinions. Secondly, the  
 334 proposed concerns include securing the autonomous driving system from computer hackers, the possibility of accidents between regular  
 335 cars and autonomous vehicles, an increase in the maintenance cost of updating the computer system of the autonomous vehicle, and  
 336 autonomous vehicle’s performance in harsh environments introduced in Supplementary Table 8. The respondent’s greatest concern was  
 337 the possibility of accidents between autonomous vehicles and regular cars with a 78.1% agreement. However, autonomous vehicles’  
 338 ability to work in a harsh environment was the least concern of the respondents with 64.9% doubting the harsh environment effect on  
 339 autonomous vehicles while 12.4% were skeptical of the environment’s effect on autonomous vehicles’ performance.

340 Finally, after being informed of the advantages and disadvantages of autonomous vehicles, 76.4% of the respondents declared  
 341 they are willing to shift to using them when they become available. On the other hand, 23.6% opposed their use in Qatar. To investigate  
 342 which categories of people are more likely to adopt autonomous vehicles, it was concluded that old adults (46 years old and over) had

343 the highest rate of people willing to adopt autonomous vehicles with 85.9% positive implications about autonomous vehicles when  
 344 compared to all other age groups. When related to their annual traveling distance, people traveling less than 20,000 kilometers were the  
 345 category that had the highest percentage of switching to autonomous vehicles with 79.5%. As for income, people with monthly incomes  
 346 of over 40,000 QAR, were the most open to switching to autonomous vehicles with 83.7% agreement among them. When we seek the  
 347 number of cars per household as an indication for switching to autonomous vehicles, households with 3 to 4 cars are the category with  
 348 the most positive adoption perspectives with 82%. Also, one important factor to consider in autonomous vehicle adoption is the people's  
 349 background knowledge of autonomous vehicles which played a major impact in affecting their openness to switching with 94.4% of  
 350 people with strong backgrounds willing to adopt autonomous vehicles. One important factor for the adoption of autonomous vehicles  
 351 would be the price for the consumer. Using combinations of bodies, Li-Ion batteries, and autonomous system prices, it is anticipated  
 352 that the average price of a fully autonomous vehicle will be around \$51600.

353 **Supplementary Table 7 | Autonomous vehicles proposed benefits summary.** n= 330 samples

|                                     | Positive (%) | Neutral (%) | Negative (%) |
|-------------------------------------|--------------|-------------|--------------|
| Reducing congestion on the roadways | 47.6         | 31.8        | 20.6         |
| Reducing fuel consumption           | 63.7         | 22.7        | 13.6         |
| Reducing travel time                | 47           | 33          | 20           |
| Reducing parking cost               | 47.9         | 32.4        | 19.7         |

354

355 **Supplementary Table 8 | Autonomous vehicles adoption concerns summary.** n= 330 samples

|                                                                | Positive (%) | Neutral (%) | Negative (%) |
|----------------------------------------------------------------|--------------|-------------|--------------|
| Securing autonomous driving systems from computer hackers      | 69.1         | 23          | 7.9          |
| Possibility of accidents between regular cars and AVs          | 78.1         | 17          | 4.9          |
| Increase in maintenance cost of updating computer system of AV | 69.1         | 21.5        | 9.4          |
| AV performance in harsh environments                           | 64.9         | 22.7        | 12.4         |

### 356 3. Life Cycle Assessment Supporting Information

357 LCA is a method for examining the environmental implications of a product over its life cycle. LCA can reveal opportunities in the  
 358 value chain of a product or a service and can provide potential environmental reduction strategies, enhance strategic planning, and  
 359 educate public policy. LCAs allow practitioners to compare diverse items, allowing them to make better-informed judgments<sup>10</sup>. LCAs

360 may also be used to improve a product, process, or system design. For instance, an LCA might identify parts of the manufacturing  
361 process that have a significant environmental effect, allowing for the construction and comparison of alternative production pathways.  
362

### 363 3.1 Manufacturing Phase 364

365 In this phase, the Manufacturing phase is assumed to comprise three processes: Manufacturing, Shipping, and Rebound effect. Nine  
366 countries including China, Japan, India, South Korea, the United States, Mexico, Germany, Turkey, and France are analyzed. These  
367 countries are represented by twelve different sedan car brands originating in those countries. Japan, the United States, and Germany  
368 have two brands each while the remaining countries are represented with only one brand each. To start, the manufacturing process  
369 comprises of manufacturing three main components of autonomous vehicles as follows:

- 370 1- Vehicle body
- 371 2- Lithium-Ion battery
- 372 3- Autonomous system components

373  
374 For our case, Stochastic decision analysis is necessary due to the inherent geographical uncertainty in the production and assembly  
375 of components for autonomous vehicles. This is because we are dealing with untested, futuristic technology. Our research considers all  
376 possible manufacturing combinations for autonomous cars and analyzes nine countries where the vehicle's body, li-ion battery, and  
377 components of the autonomous system might be built. The environmental effects of constructing a vehicle's body in one country might  
378 vary greatly from those in another due to variations in technology, availability of raw materials, and energy sources. For this reason, the  
379 research presented here is essential to the future of the autonomous electric car. This exhaustive analysis takes into consideration these  
380 variances and evaluates how they impact the development of autonomous battery electric vehicles. The results of this research may serve  
381 to influence crucial choices affecting the manufacture of vehicles by putting light on the possible effects of different production  
382 configurations. This study was conducted to throw light on these potential outcomes. The results shown in the main body of the research  
383 paper show the average estimation based on those twelve sedan brands considered. By taking the average of the data, any outliers or  
384 extreme results in a single country can be less of a factor. This gives a more consistent and accurate picture of the industrial environment.  
385 Using the average of the nine countries also helps to account for the variety and unpredictability of the data, since each country has its  
386 own unique technological, raw material, and energy source problems and opportunities. By combining the results from several countries,  
387 the research can get a more complete picture of the environment for making autonomous electric vehicles and the problems and  
388 opportunities that come with it.

389 Starting with the vehicle body, Autonomous vehicles are assumed to have identical vehicle bodies when compared to non-  
390 autonomous battery electric vehicles. In other words, the emissions associated with both cases will be similar in this matter. Secondly,  
391 Lithium-Ion Battery (LIB) currently has many chemistries associated with the materials used in the battery. The most common  
392 chemistries in the industry include Lithium Cobalt Oxide (LCO), Lithium Iron Phosphate (LFP), and Nickel Manganese Cobalt (NMC).  
393 Those three chemistries accounted for over %83 of the market share of LIB in 2016<sup>11</sup>. However, LCO is not used in automobiles for  
394 some safety risks<sup>12</sup>. LFPs have an energy density requirement that is projected to be lower than the requirements for energy density in  
395 2025<sup>13</sup>. Thus, autonomous vehicles in this study are assumed to be operated by Lithium-Ion batteries with NMC 622.

396 As for non-autonomous battery electric vehicles, the only difference between them in the manufacturing process is the autonomous  
397 system components which are absent from battery electric vehicles. Regarding the shipping process, autonomous vehicles are assumed  
398 to be shipped from their country of origin's busiest port based on the annual number of containers handled<sup>14</sup>. The destination port is  
399 assumed to be Doha port. A fixed shipping rate of 0.4 \$/ mile is used for the total shipping cost<sup>15</sup>.

400 Finally, the rebound effect is considered in the manufacturing phase since it will cause increased demand for manufacturing vehicles.  
401 Since people will travel more with autonomous vehicles because of the rebound effect, their cars will deteriorate faster, and they will  
402 need to buy a new car sooner than if it has been a non-autonomous car. Having to buy cars sooner will cause the manufacturers to  
403 produce more cars resulting in more emissions when compared to non-autonomous vehicles.

404

405

406

407

408

409

410

411

412

413 **Supplementary Table 9 | Autonomous vehicle components manufacturing checklist.** This table summarizes which countries  
 414 produce which parts within autonomous vehicles bodies, li-ion batteries, and autonomous system components.

| Country       | Component | Vehicle body | Lithium-Ion Battery | LIDAR | Ultrasonic sensors | InfraRed sensors | Cameras | CAN bus | ACC |
|---------------|-----------|--------------|---------------------|-------|--------------------|------------------|---------|---------|-----|
| China         |           | ✓            | ✓                   | ✓     | ✓                  | ✓                | ✓       | ✓       | ✓   |
| Japan         |           | ✓            | ✓                   | ✓     | ✓                  | ✓                | ✓       |         | ✓   |
| India         |           | ✓            | ✓                   |       | ✓                  | ✓                |         |         | ✓   |
| South Korea   |           | ✓            | ✓                   | ✓     | ✓                  | ✓                | ✓       | ✓       | ✓   |
| United States |           | ✓            | ✓                   | ✓     | ✓                  | ✓                | ✓       | ✓       | ✓   |
| Mexico        |           | ✓            | ✓                   |       |                    | ✓                |         |         |     |
| Germany       |           | ✓            | ✓                   | ✓     | ✓                  | ✓                | ✓       | ✓       | ✓   |
| Turkey        |           | ✓            | ✓                   |       | ✓                  |                  |         |         | ✓   |
| France        |           | ✓            | ✓                   | ✓     | ✓                  | ✓                | ✓       | ✓       | ✓   |

415 16-48

416

417

418

419

420 **Supplementary Table 10 | Autonomous vehicle components specifications & costs [1].** This table summarizes the costs of  
 421 autonomous vehicles bodies, li-ion batteries, and autonomous system components for the twelve car brands considered.

| Country       | Brand reference name | Fuel efficiency (kWh/km) | Car MSRP (\$, including battery) | Car MSRP (\$, excluding battery) | Car Production Cost (\$, excluding battery) * | Battery capacity (kWh) | Battery MSRP (\$) | Battery Production Cost (\$) | LIDAR MSRP (\$) | Ultrasonic Sensors MSRP (\$) | Infrared Sensors MSRP (\$) | Cameras MSRP (\$) | RADAR MSRP (\$) | Processor & Software MSRP (\$) | ACC MSRP (\$) | Total Autonomous System MSRP (\$) |
|---------------|----------------------|--------------------------|----------------------------------|----------------------------------|-----------------------------------------------|------------------------|-------------------|------------------------------|-----------------|------------------------------|----------------------------|-------------------|-----------------|--------------------------------|---------------|-----------------------------------|
| China         | China                | 0.14                     | 37848                            | 30839                            | 24671                                         | 53.1                   | 7009              | 4906                         | 1898            | 112                          | 1853                       | 1052              | 500             | 1522                           | 1789          | 8726                              |
| Japan         | Japan 1              | 0.19                     | 36278                            | 26853                            | 21482                                         | 71.4                   | 9425              | 6598                         | 4122            | 150                          | 2214                       | 1205              | 1000            | 1745                           | 2112          | 12548                             |
| Japan         | Japan 2              | 0.174                    | 28361                            | 20177                            | 16142                                         | 62                     | 8184              | 5729                         | 2738            | 146                          | 2214                       | 1205              | 2276            | 1745                           | 1800          | 12124                             |
| India         | India                | 0.0968                   | 22088                            | 18102                            | 14482                                         | 30.2                   | 3986              | 2790                         | 600             | 105                          | 1748                       | 1007              | 1848            | 1458                           | 1696          | 8462                              |
| South Korea   | Korea                | 0.186                    | 40418                            | 32762                            | 26210                                         | 58                     | 7656              | 5359                         | 1740            | 130                          | 2124                       | 1167              | 3500            | 1690                           | 2032          | 12383                             |
| United States | US 1                 | 0.2                      | 42895                            | 29867                            | 23894                                         | 98.7                   | 13028             | 9120                         | 1000            | -                            | -                          | 1330              | 2833            | 1925                           | 3200          | 10288                             |
| United States | US 2                 | 0.17                     | 49440                            | 38616                            | 30893                                         | 82                     | 10824             | 7577                         | 3470            | 130                          | 2507                       | 1330              | 2833            | 1925                           | 2374          | 14569                             |
| Mexico        | Mexico               | 0.1125                   | 28678                            | 26302                            | 21042                                         | 18                     | 2376              | 1663                         | 1300            | 111                          | 1828                       | 1041              | 1954            | 1507                           | 1767          | 9508                              |
| Germany       | Germany 1            | 0.182                    | 42472                            | 35212                            | 28170                                         | 55                     | 7260              | 5082                         | 8270            | 83                           | 2300                       | 1242              | 3263            | 1798                           | 2189          | 19145                             |
| Germany       | Germany 2            | 0.172                    | 64611                            | 53536                            | 42829                                         | 83.9                   | 11075             | 7753                         | 4618            | 141                          | 2300                       | 1242              | 3040            | 1798                           | 1700          | 14839                             |
| Turkey        | Turkey               | 0.18                     | 44402                            | 32522                            | 26018                                         | 90                     | 11880             | 8316                         | 3790            | 111                          | 1835                       | 1044              | 1964            | 1511                           | 1773          | 12028                             |
| France        | France               | 0.165                    | 35034                            | 27814                            | 22251                                         | 54.7                   | 7220              | 5054                         | 1000            | 185                          | 2203                       | 1201              | 3380            | 1738                           | 2102          | 11809                             |



422 -Body: 20% profit margin [49], Battery: 30% profit margin (assumed), Autonomous system components 30% profit margin (assumed)

423

424 **Supplementary Table 11 | Autonomous vehicle components specifications & costs reference[2].** This table shows the  
 425 references for the costs of autonomous vehicles bodies, li-ion batteries, and autonomous system components for the twelve  
 426 car brands considered.

| Country       | Brand reference name | Fuel efficiency | Car MSRP (\$, including battery) | Car weight | Battery capacity (kWh) | Battery MSRP (\$) | LIDAR       | Ultrasonic Sensors      | Infrared Sensors | Cameras                    | RADAR | Processor & Software | ACC |
|---------------|----------------------|-----------------|----------------------------------|------------|------------------------|-------------------|-------------|-------------------------|------------------|----------------------------|-------|----------------------|-----|
| China         | China                | 50              | 50                               | 50         | 50                     | 51                | 52          | *1                      | *2               | *3                         | 53    | *5                   | *6  |
| Japan         | Japan 1              | 54              | 55                               | 54         | 54                     | 51                | 56<br>150 m | 57                      | *2               | *3                         | 58    | *5                   | *6  |
| Japan         | Japan 2              | 54              | 59                               | 60         | 54                     | 51                | 61          | 62                      | *2               | *3                         | 63    | *5                   | 64  |
| India         | India                | 65              | 65                               | 65         | 65                     | 51                | 66          | *1                      | *2               | *3                         | *4    | *5                   | *6  |
| South Korea   | Korea                | 54              | 67                               | 54         | 54                     | 51                | 68          | *1                      | *2               | *3                         | 69    | 70-73                | *6  |
| United States | US 1                 | 54              | 74                               | 75         | 54                     | 51                | 76          | -<br>Included in ACC 77 | *2               | 78-80<br>assumed 4 cameras | *4    | *5                   | 81  |
| United States | US 2                 | 54              | 82                               | 54         | 54                     | 51                | 83          | 84                      | *2               | *3                         | *4    | *5                   | *6  |
| Mexico        | Mexico               | 85              | 86                               | 87         | 87                     | 51                | 88          | *1                      | *2               | *3                         | *4    | *5                   | *6  |
| Germany       | Germany 1            | 54              | 89                               | 54         | 54                     | 51                | 90          | 91                      | *2               | *3                         | 92    | *5                   | *6  |
| Germany       | Germany 2            | 54              | 93                               | 54         | 54                     | 51                | *           | *1                      | 94               | *3                         | 95    | *5                   | 96  |

|        |        |    |     |           |    |    |     |     |    |    |     |    |    |
|--------|--------|----|-----|-----------|----|----|-----|-----|----|----|-----|----|----|
| Turkey | Turkey | 97 | 98  | Estimated | 97 | 51 | 99  | *1  | *2 | *3 | *4  | *5 | *6 |
| France | France | 54 | 100 | 54        | 54 | 51 | 101 | 102 | *2 | *3 | 103 | *5 | *6 |

427

428

429 \* Estimate component price in country Y based on other countries' component prices (Country X) using  $Price\ in\ country\ Y =$   
 430  $(0.75 \times Price\ in\ country\ X) + (0.25 \times \left(\frac{GDP\ per\ capita\ for\ country\ Y}{GDP\ per\ capita\ for\ country\ X}\right) \times Price\ in\ country\ X)$  (5). Estimating a  
 431 component's price in country Y using multiple prices from country X is as follows:

432 A- Estimate component price for country Y using country X information.

433 B- Repeat (A) for all countries' component prices X

434 C- Round prices to a whole number obtained in (B), then their average is the components price for country Y using multiple components  
 435 prices from countries X.

436  $Price\ in\ country\ Y = (0.75 \times Price\ in\ country\ X) + (0.25 \times \left(\frac{GDP\ per\ capita\ for\ country\ Y}{GDP\ per\ capita\ for\ country\ X}\right) \times Price\ in\ country\ X)$   
 437 (5)

438 \* LIDAR price estimation for GERMANY 2 using the given prices from CHINA, Japan 1, Japan 2, INDIA, Korea, US 1, US 2,  
 439 Mexico, Germany 1, TURKEY, and France:

440 = Average  $(0.75 \times 1898 + 0.25 \times (64530 \div 10550) \times 1898)$ ,  $(0.75 \times 4122 + 0.25 \times (64530 \div 40360) \times 4122)$ ,  $(0.75 \times 2338 + 0.25 \times$   
 441  $(64530 \div 40360) \times 2338)$ ,  $(0.75 \times 600 + 0.25 \times (64530 \div 1920) \times 600)$ ,  $(0.75 \times 1740 + 0.25 \times (64530 \div 32960) \times 1740)$ ,  $(0.75 \times 1000 +$   
 442  $0.25 \times (64530 \div 64530) \times 1000)$ ,  $(0.75 \times 3470 + 0.25 \times (64530 \div 8480) \times 3470)$ ,  $(0.75 \times 1300 + 0.25 \times (64530 \div 47470) \times 1300)$ ,  $(0.75$   
 443  $\times 8270 + 0.25 \times (64530 \div 47470) \times 8270)$ ,  $(0.75 \times 3790 + 0.25 \times (64530 \div 9050) \times 3790)$ ,  $(0.75 \times 1000 + 0.25 \times (64530 \div 39480) \times$   
 444  $1000) = 4618$

445

446 \*1 Ultrasonic sensor price estimation using the given prices from Japan 1, Japan 2, US 2, Germany 1, and France:

- 447 A- CHINA = Average  $(0.75 \times 150 + 0.25 \times (10550 \div 40360) \times 150)$ ,  $(0.75 \times 146 + 0.25 \times (10550 \div 40360) \times 146)$ ,  $(0.75 \times 130 +$   
448  $0.25 \times (10550 \div 64530) \times 130)$ ,  $(0.75 \times 83 + 0.25 \times (10550 \div 47470) \times 83)$ ,  $(0.75 \times 185 + 0.25 \times (10550 \div 39480) \times 185) = 112$   
449 B- INDIA = Average  $(0.75 \times 150 + 0.25 \times (1920 \div 40360) \times 150)$ ,  $(0.75 \times 146 + 0.25 \times (1920 \div 40360) \times 146)$ ,  $(0.75 \times 130 + 0.25$   
450  $\times (1920 \div 64530) \times 130)$ ,  $(0.75 \times 83 + 0.25 \times (1920 \div 47470) \times 83)$ ,  $(0.75 \times 185 + 0.25 \times (1920 \div 39480) \times 185) = 105$   
451 C- Korea = Average  $(0.75 \times 150 + 0.25 \times (32960 \div 40360) \times 150)$ ,  $(0.75 \times 146 + 0.25 \times (32960 \div 40360) \times 146)$ ,  $(0.75 \times 130 + 0.25$   
452  $\times (32960 \div 64530) \times 130)$ ,  $(0.75 \times 83 + 0.25 \times (32960 \div 47470) \times 83)$ ,  $(0.75 \times 185 + 0.25 \times (32960 \div 39480) \times 185) = 130$   
453 D- Mexico = Average  $(0.75 \times 150 + 0.25 \times (8480 \div 40360) \times 150)$ ,  $(0.75 \times 146 + 0.25 \times (8480 \div 40360) \times 146)$ ,  $(0.75 \times 130 + 0.25$   
454  $\times (8480 \div 64530) \times 130)$ ,  $(0.75 \times 83 + 0.25 \times (8480 \div 47470) \times 83)$ ,  $(0.75 \times 185 + 0.25 \times (8480 \div 39480) \times 185) = 111$   
455 E- GERMANY 2 = Average  $(0.75 \times 150 + 0.25 \times (47470 \div 40360) \times 150)$ ,  $(0.75 \times 146 + 0.25 \times (47470 \div 40360) \times 146)$ ,  $(0.75 \times$   
456  $130 + 0.25 \times (47470 \div 64530) \times 130)$ ,  $(0.75 \times 83 + 0.25 \times (47470 \div 47470) \times 83)$ ,  $(0.75 \times 185 + 0.25 \times (47470 \div 39480) \times 185)$   
457  $= 141$   
458 F- TURKEY = Average  $(0.75 \times 150 + 0.25 \times (9050 \div 40360) \times 150)$ ,  $(0.75 \times 146 + 0.25 \times (9050 \div 40360) \times 146)$ ,  $(0.75 \times 130 +$   
459  $0.25 \times (9050 \div 64530) \times 130)$ ,  $(0.75 \times 83 + 0.25 \times (9050 \div 47470) \times 83)$ ,  $(0.75 \times 185 + 0.25 \times (9050 \div 39480) \times 185) = 111$

460

461 2\* Infrared sensors price estimation using the given price from GERMANY 2:

- 462 A- CHINA =  $0.75 \times 2300 + 0.25 \times (10550 \div 47470) \times 2300 = 1853$   
463 B- Japan 1 =  $0.75 \times 2300 + 0.25 \times (40360 \div 47470) \times 2300 = 2214$   
464 C- Japan 2 =  $0.75 \times 2300 + 0.25 \times (40360 \div 47470) \times 2300 = 2214$   
465 D- INDIA =  $0.75 \times 2300 + 0.25 \times (1920 \div 47470) \times 2300 = 1748$   
466 E- Korea =  $0.75 \times 2300 + 0.25 \times (32960 \div 47470) \times 2300 = 2124$   
467 F- US 1 =  $0.75 \times 2300 + 0.25 \times (64530 \div 47470) \times 2300 = 2507$   
468 G- US 2 =  $0.75 \times 2300 + 0.25 \times (64530 \div 47470) \times 2300 = 2507$   
469 H- Mexico =  $0.75 \times 2300 + 0.25 \times (8480 \div 47470) \times 2300 = 1828$   
470 I- Germany 1 =  $0.75 \times 2300 + 0.25 \times (47470 \div 47470) = 2300$   
471 J- TURKEY =  $0.75 \times 2300 + 0.25 \times (9050 \div 47470) \times 2300 = 1835$   
472 K- France =  $0.75 \times 2300 + 0.25 \times (39480 \div 47470) \times 2300 = 2203$

473

474 3\* Camera price estimation using the given price from US 1:

- 475 A- CHINA =  $0.75 \times 1330 + 0.25 \times (10550 \div 64530) \times 1330 = 1052$   
 476 B- Japan 1 =  $0.75 \times 1330 + 0.25 \times (40360 \div 64530) \times 1330 = 1205$   
 477 C- Japan 2 =  $0.75 \times 1330 + 0.25 \times (40360 \div 64530) \times 1330 = 1205$   
 478 D- INDIA =  $0.75 \times 1330 + 0.25 \times (1920 \div 64530) \times 1330 = 1007$   
 479 E- Korea =  $0.75 \times 1330 + 0.25 \times (32960 \div 64530) \times 1330 = 1167$   
 480 F- US 2 =  $0.75 \times 1330 + 0.25 \times (64530 \div 64530) \times 1330 = 1330$   
 481 G- Mexico =  $0.75 \times 1330 + 0.25 \times (8480 \div 64530) \times 1330 = 1041$   
 482 H- Germany 1 =  $0.75 \times 1330 + 0.25 \times (47470 \div 64530) \times 1330 = 1242$   
 483 I- GERMANY 2 =  $0.75 \times 1330 + 0.25 \times (47470 \div 64530) \times 1330 = 1242$   
 484 J- TURKEY =  $0.75 \times 1330 + 0.25 \times (9050 \div 64530) \times 1330 = 1044$   
 485 K- France =  $0.75 \times 1330 + 0.25 \times (39480 \div 64530) \times 1330 = 1201$

486 4\* Radar price estimation using the given prices from CHINA, Japan 1, Japan 2, Korea, Germany 1, GERMANY 2, and France:

- 487 A- INDIA = Average ( $0.75 \times 500 + 0.25 \times (1920 \div 10550) \times 500$ ), ( $0.75 \times 1000 + 0.25 \times (1920 \div 40360) \times 1000$ ), ( $0.75 \times 2276 +$   
 488  $0.25 \times (1920 \div 40360) \times 2276$ ), ( $0.75 \times 3500 + 0.25 \times (1920 \div 32960) \times 3500$ ), ( $0.75 \times 3263 + 0.25 \times (1920 \div 47470) \times 3263$ ),  
 489 ( $0.75 \times 3040 + 0.25 \times (1920 \div 47470) \times 3040$ ), ( $0.75 \times 3380 + 0.25 \times (1920 \div 39480) \times 3380$ ) = 1848  
 490 B- US 1 = Average ( $0.75 \times 500 + 0.25 \times (64530 \div 10550) \times 500$ ), ( $0.75 \times 1000 + 0.25 \times (64530 \div 40360) \times 1000$ ), ( $0.75 \times 2276 +$   
 491  $0.25 \times (64530 \div 40360) \times 2276$ ), ( $0.75 \times 3500 + 0.25 \times (64530 \div 32960) \times 3500$ ), ( $0.75 \times 3263 + 0.25 \times (64530 \div 47470) \times$   
 492  $3263$ ), ( $0.75 \times 3040 + 0.25 \times (64530 \div 47470) \times 3040$ ), ( $0.75 \times 3380 + 0.25 \times (64530 \div 39480) \times 3380$ ) = 2833  
 493 C- US 2 = Average ( $0.75 \times 500 + 0.25 \times (64530 \div 10550) \times 500$ ), ( $0.75 \times 1000 + 0.25 \times (64530 \div 40360) \times 1000$ ), ( $0.75 \times 2276 +$   
 494  $0.25 \times (64530 \div 40360) \times 2276$ ), ( $0.75 \times 3500 + 0.25 \times (64530 \div 32960) \times 3500$ ), ( $0.75 \times 3263 + 0.25 \times (64530 \div 47470) \times$   
 495  $3263$ ), ( $0.75 \times 3040 + 0.25 \times (64530 \div 47470) \times 3040$ ), ( $0.75 \times 3380 + 0.25 \times (64530 \div 39480) \times 3380$ ) = 2833  
 496 D- Mexico = Average ( $0.75 \times 500 + 0.25 \times (8480 \div 10550) \times 500$ ), ( $0.75 \times 1000 + 0.25 \times (8480 \div 40360) \times 1000$ ), ( $0.75 \times 2276 +$   
 497  $0.25 \times (8480 \div 40360) \times 2276$ ), ( $0.75 \times 3500 + 0.25 \times (8480 \div 32960) \times 3500$ ), ( $0.75 \times 3263 + 0.25 \times (8480 \div 47470) \times 3263$ ),  
 498 ( $0.75 \times 3040 + 0.25 \times (8480 \div 47470) \times 3040$ ), ( $0.75 \times 3380 + 0.25 \times (8480 \div 39480) \times 3380$ ) = 1954  
 499 E- TURKEY = Average ( $0.75 \times 500 + 0.25 \times (9050 \div 10550) \times 500$ ), ( $0.75 \times 1000 + 0.25 \times (9050 \div 40360) \times 1000$ ), ( $0.75 \times 2276$   
 500  $+ 0.25 \times (9050 \div 40360) \times 2276$ ), ( $0.75 \times 3500 + 0.25 \times (9050 \div 32960) \times 3500$ ), ( $0.75 \times 3263 + 0.25 \times (9050 \div 47470) \times 3263$ ),  
 501 ( $0.75 \times 3040 + 0.25 \times (9050 \div 47470) \times 3040$ ), ( $0.75 \times 3380 + 0.25 \times (9050 \div 39480) \times 3380$ ) = 1964

502

503 5\* Processor & Software:

504 US 2: (Processor \$1,500, DSRC \$73, V2X \$222, and GPS \$130). Total: \$1925

505 price estimation using the given price from US 2:

506 A- CHINA=  $0.75 \times 1925 + 0.25 \times (10550 \div 64530) \times 1925 = 1522$

507 B- Japan 1=  $0.75 \times 1925 + 0.25 \times (40360 \div 64530) \times 1925 = 1745$

508 C- Japan 2=  $0.75 \times 1925 + 0.25 \times (40360 \div 64530) \times 1925 = 1745$

509 D- INDIA=  $0.75 \times 1925 + 0.25 \times (1920 \div 64530) \times 1925 = 1458$

510 E- Korea=  $0.75 \times 1925 + 0.25 \times (32960 \div 64530) \times 1925 = 1690$

511 F- US 1=  $0.75 \times 1925 + 0.25 \times (64530 \div 64530) \times 1925 = 1925$

512 G- Mexico=  $0.75 \times 1925 + 0.25 \times (8480 \div 64530) \times 1925 = 1507$

513 H- Germany 1=  $0.75 \times 1925 + 0.25 \times (47470 \div 64530) \times 1925 = 1798$

514 I- GERMANY 2=  $0.75 \times 1925 + 0.25 \times (47470 \div 64530) \times 1925 = 1798$

515 J- TURKEY=  $0.75 \times 1925 + 0.25 \times (9050 \div 64530) \times 1925 = 1511$

516 K- France=  $0.75 \times 1925 + 0.25 \times (39480 \div 64530) \times 1925 = 1738$

517

518 6\* Adaptive cruise control cost estimation using given prices from Japan 2, US 1, and GERMANY 2:

519 A- CHINA = Average  $(0.75 \times 1800 + 0.25 \times (10550 \div 40360) \times 1800)$ ,  $(0.75 \times 3200 + 0.25 \times (10550 \div 64530) \times 3200)$ ,  $(0.75 \times$   
520  $1700 + 0.25 \times (10550 \div 47470) \times 1700) = 1789$

521 B- Japan 1 = Average  $(0.75 \times 1800 + 0.25 \times (40360 \div 40360) \times 1800)$ ,  $(0.75 \times 3200 + 0.25 \times (40360 \div 64530) \times 3200)$ ,  $(0.75 \times$   
522  $1700 + 0.25 \times (40360 \div 47470) \times 1700) = 2112$

523 C- INDIA = Average  $(0.75 \times 1800 + 0.25 \times (1920 \div 40360) \times 1800)$ ,  $(0.75 \times 3200 + 0.25 \times (1920 \div 64530) \times 3200)$ ,  $(0.75 \times 1700$   
524  $+ 0.25 \times (1920 \div 47470) \times 1700) = 1696$

525 D- Korea = Average  $(0.75 \times 1800 + 0.25 \times (32960 \div 40360) \times 1800)$ ,  $(0.75 \times 3200 + 0.25 \times (32960 \div 64530) \times 3200)$ ,  $(0.75 \times 1700$   
526  $+ 0.25 \times (32960 \div 47470) \times 1700) = 2032$

527 E- US 2 = Average  $(0.75 \times 1800 + 0.25 \times (64530 \div 40360) \times 1800)$ ,  $(0.75 \times 3200 + 0.25 \times (64530 \div 64530) \times 3200)$ ,  $(0.75 \times 1700$   
528  $+ 0.25 \times (64530 \div 47470) \times 1700) = 2374$

529 F- Mexico = Average  $(0.75 \times 1800 + 0.25 \times (8480 \div 40360) \times 1800)$ ,  $(0.75 \times 3200 + 0.25 \times (8480 \div 64530) \times 3200)$ ,  $(0.75 \times 1700$   
530  $+ 0.25 \times (8480 \div 47470) \times 1700) = 1767$

531 G- Germany 1 = Average  $(0.75 \times 1800 + 0.25 \times (47470 \div 40360) \times 1800)$ ,  $(0.75 \times 3200 + 0.25 \times (47470 \div 64530) \times 3200)$ ,  $(0.75$   
532  $\times 1700 + 0.25 \times (47470 \div 47470) \times 1700) = 2189$

533 H- TURKEY = Average  $(0.75 \times 1800 + 0.25 \times (9050 \div 40360) \times 1800)$ ,  $(0.75 \times 3200 + 0.25 \times (9050 \div 64530) \times 3200)$ ,  $(0.75 \times$   
534  $1700 + 0.25 \times (9050 \div 47470) \times 1700) = 1773$   
535 I- France = Average  $(0.75 \times 1800 + 0.25 \times (39480 \div 40360) \times 1800)$ ,  $(0.75 \times 3200 + 0.25 \times (39480 \div 64530) \times 3200)$ ,  $(0.75 \times$   
536  $1700 + 0.25 \times (39480 \div 47470) \times 1700) = 2102$

537

### 538 3.2 Operation Phase

539 In this phase, the emissions produced during service life are estimated. Mainly, emissions in the vehicle's operation phase come from  
540 two different parts: Well-to-Tank (WTT) and Tank-to-Wheel (TTW). Starting with WTT, it is concerned with the emerging emissions  
541 due to the production, processing, and delivery of energy. As for TTW, it represents tailpipe emissions emerging due to the vehicle  
542 operation. Autonomous vehicles aren't associated with any TTW emissions (since they are assumed to be operated by batteries and have  
543 no tailpipe emissions). For this reason, the only emissions assessed in the operation phase are for the electricity generation to charge  
544 batteries.  $EGE = EGP \times GHG \text{ Factor} \times ETL \text{ Factor}$

545  $(\ )$  is used to calculate emissions associated with the generation of 1 kWh of electricity in Qatar.

546  $EGE = EGP \times GHG \text{ Factor} \times ETL \text{ Factor}$  (6)

547 Where EGE: electricity generation emission (Kg GHG); EGP: electricity generation price (constant, 0.15 QAR/kWh<sup>104</sup>); GHG factor (kg GHG/kWh):  
548 obtained from the EXIOBASE database using electricity generation from gas as a sector for scenarios 1 and 2, electricity generation using Photovoltaics for  
549 scenarios 3 and 4, the year 2021 as a basis, and World Middle East (WM) as a reference country; ETL factor: The electricity transmission losses factor is used to  
550 compensate for 10% of energy losses from the transmission of electricity.

551 However, this EGE value of emissions accounts for 1 kWh only. To find emissions associated with driving 1-kilometer using  
552 autonomous vehicles, we must first quantify one of the proposed benefits of adopting autonomous vehicles which is the increased fuel  
553 efficiency due to autonomy. <sup>105</sup> concluded that autonomous vehicles introduce improvement in fuel efficiency when compared to non-  
554 autonomous vehicles, the improved fuel efficiency is referred to as fuel economy for this paper. The improvement is quantified to be  
555 approximately 23.6%. In this study, this value is used to compensate for this improvement as in  $FEC = BEV - FE \div (1 + FEI)$

556  $(7)$ . The fuel  
557 efficiency values for the twelve brands considered are taken from their perspective manufacturers. Refer to Supplementary Table 10 for  
558 the fuel efficiency values and

559 Supplementary Table 11 for references to those values. Considering different values of fuel efficiencies for the considered sedan  
560 vehicles assists in facing the uncertainty associated with operating parameters (fuel efficiency) of an emerging technology such as

561 autonomous vehicles. The improvement is mirrored in all twelve brands considered, where each of the vehicles considered gains an  
562 improvement in fuel efficiency when they are assumed to be AVs.

$$563 \quad FEC = \frac{BEV-FE}{(1+FEI)} \quad (7)$$

564 Where FEC: fuel economy (kWh/km); BEV-FE: battery electric vehicle fuel efficiency (kWh/Km); FEI: % improvement in fuel efficiency. Then, FEC is  
565 used to calculate autonomous vehicle's operation phase emissions factor for each GHG considered as in

$$566 \quad AV-OP\ EF = EGE \times FEC$$

567

$$568 \quad AV - OP\ EF = EGE \times FEC \quad (8)$$

569 Where AV-OP EF: autonomous vehicle operation phase emission factor.

### 570 3.3 End-of-Life Phase

571 The End-of-Life (EOL) phase is the subsequent phase after the vehicle has reached its maximum mileage after which it is salvaged.  
572 Generally, this phase results in a saving in emissions since recycling sends out fewer emissions when compared to mining for the  
573 materials. This is because recycling requires less energy than the mining process which indicates it requires less fossil fuel to burn for  
574 the process<sup>106</sup>. This outcome is resembled by negative values of emissions due to savings resulting from recycling. To start, the GREET  
575 model for the year 2021 is used to obtain what materials exist in a vehicle as well as for a Li-Ion battery. Then for the autonomous  
576 system, each part is divided into the materials it comprises. Consequently, for each material used in the autonomous vehicle, the total  
577 amount needed in a vehicle is calculated. Then, the recycling emissions saving (RES) is calculated for each material (x) as in equation  
578 (9) using GWP values for recycling (GWPR) and mining (GWPM). The recovery rate (RR) is used to compensate for the losses of the  
579 material during the recycling process.

$$580 \quad RES(x) = \frac{x \text{ in AV}}{RR(x)} \times GWPR(x) - x \text{ in AV} \times GWPM(x) \quad (9)$$

581 Next is the global warming potential (GWP) for the considered greenhouse gases is calculated to come up with a unified  
582 measure of emissions rather than expressing the emissions of each greenhouse gas by itself as follows in equation (10).

583  $LC\ GWP = LC\ CO_2 + LC\ CH_4 \times CH_4\ GWP + LC\ N_2O \times N_2O\ GWP$  (10)

584 Where LC GWP: life cycle global warming potential (Kg CO<sub>2</sub>-Eq.); LC CO<sub>2</sub>: life cycle carbon dioxide emissions; LC CH<sub>4</sub>: life cycle methane emissions;  
 585 CH<sub>4</sub> GWP: methane global warming potential (27.9) 107; LC N<sub>2</sub>O: life cycle nitrous oxide emissions; N<sub>2</sub>O GWP: nitrous oxide global warming potential (273)  
 586 <sup>107</sup>.

587

588 **3.4 Monte Carlo Simulation**

589 Uncertainty in life cycle assessment influences the model’s reliability and is one of its main challenges<sup>108</sup>. The uncertainty stems  
 590 from three main sources: parameter, scenario, and model<sup>109</sup>. To start, parameter uncertainty comes from inherent variability in the  
 591 sampled population, uncertainty in seen or measured values, and data quality uncertainty. Scenario uncertainty arises from normative  
 592 choices made throughout the scenario-building process, such as those regarding the functional unit and the time horizon. Lastly, model  
 593 uncertainty is due to the underlying structure of the models and the mathematical linkages that describe them. Addressing the uncertainty  
 594 involves determining the total uncertainty of the conclusion based on the uncertainty of all the parameters and model selections of the  
 595 simulated product system, and then generating a confidence interval for the results. the simulation parameters are shown in  
 596 Supplementary Table 12 while Supplementary Table 13 shows the summary of the simulation results.

597

598 **Supplementary Table 12 | Monte Carlo simulation parameters for given scenarios.** This table shows each input variable  
 599 distribution for different life cycle variables among the four scenarios considered in this study.

| Input/Output | Variable Name                                     | Scenarios                                                                                          |                                                              |                                                                                                    |                                                              |
|--------------|---------------------------------------------------|----------------------------------------------------------------------------------------------------|--------------------------------------------------------------|----------------------------------------------------------------------------------------------------|--------------------------------------------------------------|
|              |                                                   | Scenario 1                                                                                         | Scenario 2                                                   | Scenario 3                                                                                         | Scenario 4                                                   |
| Input 1      | Manufacturing emissions (ton CO <sub>2</sub> -Eq) | Burr12(0,14.338,7.9189,0.76653)                                                                    | Burr12(0,2.383,7.3676,0.84094)                               | Burr12(0,14.338,7.9189,0.76653)                                                                    | Burr12(0,2.383,7.3676,0.84094)                               |
| Input 2      | Rebound effect (%)                                | -                                                                                                  | Normal(1.26,0.0625)                                          | -                                                                                                  | Normal(1.26,0.0625)                                          |
| Input 3      | Fuel efficiency (kWh/km)                          | Dagum(0,0.19557,49.105,0.098342)                                                                   | Dagum(0,0.15822,49.105,0.098342)                             | Dagum(0,0.19557,49.105,0.098342)                                                                   | Dagum(0,0.15822,49.105,0.098342)                             |
| Input 4      | Operation phase constant                          | 119.2156092                                                                                        | 119.2156092                                                  | 23.0441544                                                                                         | 23.0441544                                                   |
| Input 5      | End-of-Life emissions (t CO <sub>2</sub> -Eq)     | Fréchet (-13.0133,5.7793,5.7732)                                                                   | Fréchet (-13.8492,6.4315,6.1543)                             | Fréchet (-13.0133,5.7793,5.7732)                                                                   | Fréchet (-13.8492,6.4315,6.1543)                             |
| Output       | Life-Cycle Global Warming                         | (Manufacturing emissions) + (Fuel efficiency × Operation phase constant) + (End-of-Life emissions) | (Manufacturing emissions × Rebound effect) + (Fuel economy × | (Manufacturing emissions) + (Fuel efficiency × Operation phase constant) + (End-of-Life emissions) | (Manufacturing emissions × Rebound effect) + (Fuel economy × |



- | Potential<br>(tCO <sub>2</sub> -Eq.) | Operation phase constant) + (End-<br>of-Life emissions) | Operation phase constant) + (End-<br>of-Life emissions) |
|--------------------------------------|---------------------------------------------------------|---------------------------------------------------------|
|--------------------------------------|---------------------------------------------------------|---------------------------------------------------------|
- 600
- 601 • *Operation phase constant* =  $(EGP \times CO_2 - factor + EGP \times CH_4 - factor \times CH_4 - GWP + EGP \times N_2O - factor \times N_2O - GWP) \times$
- 602  $(1000 \text{ (per kilometer} \rightarrow \text{total)}) \times \frac{ETL}{1000000(\text{gram} \rightarrow \text{ton})} * \frac{300,000 \text{ kilometers}}{1,000,000 \text{ gCO}_2\text{-Eq.}}$ .
- 603 • Where EGP: electricity generation price: 0.15 QAR/kWh; CO<sub>2</sub>-factor (Scenarios 1,2): 9582237.199 KgCO<sub>2</sub>/ M€; CH<sub>4</sub>-factor(Scenarios 1,2):
- 604 1588.725084 KgCH<sub>4</sub>/ M€; CH<sub>4</sub>-GWP: 27.9; N<sub>2</sub>O-factor (Scenarios 1,2): 25.72143439 KgN<sub>2</sub>O/ M€; CO<sub>2</sub>-factor (Scenarios 3,4): 9582237.199 KgCO<sub>2</sub>/
- 605 M€; CH<sub>4</sub>-factor(Scenarios 3,4): 1588.725084 KgCH<sub>4</sub>/ M€; CH<sub>4</sub>-GWP: 27.9; N<sub>2</sub>O-factor (Scenarios 3,4): 25.72143439 KgN<sub>2</sub>O/ M€; N<sub>2</sub>O-GWP: 273;
- 606 ETL: electricity transmission losses factor: 1.1.

607 **Supplementary Table 13 | Monte Carlo simulation results. n=10,000 samples**

| Scenario                                    | Scenario 1 | Scenario 2 | Scenario 3 | Scenario 4 |
|---------------------------------------------|------------|------------|------------|------------|
| Mean (t CO <sub>2</sub> -Eq)                | 28.669     | 36.773     | 13.028     | 24.119     |
| Standard deviation (t CO <sub>2</sub> -Eq)  | 5.801      | 8.59       | 4.753      | 8.185      |
| Interquartile range (t CO <sub>2</sub> -Eq) | 6.589      | 9.738      | 5.486      | 9.166      |
| Skewness                                    | 0.065348   | 1.42754    | 1.58115    | 1.62714    |
| Kurtosis                                    | 3.29811    | 7.43156    | 6.69035    | 7.46002    |

608

609

610

611

612

613

614

615

616

617

618

619

620

621

622

623

624

625           Supplementary Supplementary Fig. *11* shows the breakdown of each phase in the life cycle for scenarios 3 and 4 using  
626 Photovoltaics.

627

628

**(a)**

**(b)**

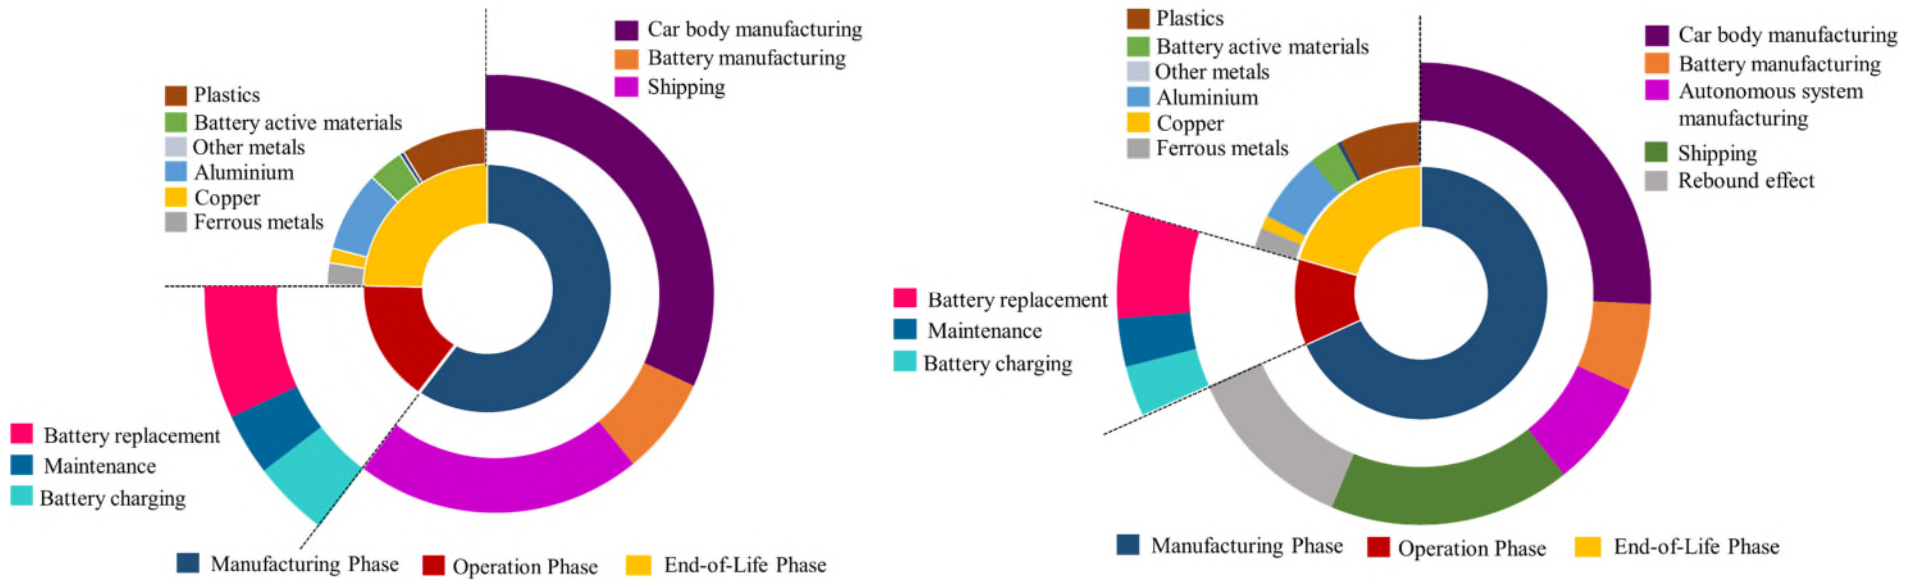

629

630 **Supplementary Fig. 11 | Breakdown of life cycle emissions.** a, Scenario 3. b, Scenario 4. This figure aims to provide a breakdown  
 631 of life cycle emissions by phase and process simultaneously.

632

633

634

635

636 **Supplementary Table 14 | Manufacturing, operation, and end-of-life phases cost combinations summary.** n=10,000 samples.

| Statistical measure | Value   |
|---------------------|---------|
| Mean                | 51579.5 |
| Standard error      | 233.5   |

|                    |            |
|--------------------|------------|
| Median             | 50648      |
| Mode               | 49876      |
| Standard deviation | 9706.2     |
| Sample variance    | 94210631.3 |
| Kurtosis           | 0.842      |
| Skewness           | 0.762      |
| Range              | 56769      |
| Minimum            | 28940      |
| Maximum            | 85709      |
| n                  | 1728       |

637

638

639

640

641

642

643

644

645

646

647           **Supplementary References**

- 648   1.   Automated Vehicles for Safety | NHTSA. <https://www.nhtsa.gov/technology-innovation/automated-vehicles-safety>.
- 649   2.   Blueprint for Autonomous Urbanism: Second Edition | National Association of City Transportation Officials.  
650       <https://nacto.org/publication/bau2/>.
- 651   3.   DSRC Technology, 802.11p standard, ITS-G5, ETSI ITS-G5, IEEE802.11p. <https://auto-talks.com/technology/dsrc-technology/>.
- 652   4.   Connected Vehicles Technology | V2X, V2V, V2I communication | Autotalks. <https://auto-talks.com/>.
- 653   5.   The Functional Components of Autonomous Vehicles - Expert Article | Robson Forensic.  
654       <https://www.robsonforensic.com/articles/autonomous-vehicles-sensors-expert>.
- 655   6.   Three Sensor Types Drive Autonomous Vehicles | Fierce Electronics. [https://www.fierceelectronics.com/components/three-sensor-types-](https://www.fierceelectronics.com/components/three-sensor-types-drive-autonomous-vehicles)  
656       [drive-autonomous-vehicles](https://www.fierceelectronics.com/components/three-sensor-types-drive-autonomous-vehicles).
- 657   7.   Ondruš, J., Kolla, E., Vertaľ, P. & Šarić, Ž. How Do Autonomous Cars Work? *Transportation Research Procedia* **44**, 226–233 (2020).
- 658   8.   Infographic: The Electrical Components of the Self-Driving Car - ASME. [https://www.asme.org/topics-resources/content/infographic-the-](https://www.asme.org/topics-resources/content/infographic-the-electrical-components-of-the-self-driving-car)  
659       [electrical-components-of-the-self-driving-car](https://www.asme.org/topics-resources/content/infographic-the-electrical-components-of-the-self-driving-car).
- 660   9.   Matzarakis, A. & Fröhlich, D. Sport events and climate for visitors—the case of FIFA World Cup in Qatar 2022. *Int J Biometeorol* **59**, 481–  
661       486 (2015).
- 662   10.   Algren, M., Fisher, W. & Landis, A. E. Machine learning in life cycle assessment. *Data Science Applied to Sustainability Analysis* 167–190  
663       (2021) doi:10.1016/B978-0-12-817976-5.00009-7.
- 664   11.   Ding, Y., Cano, Z. P., Yu, A., Lu, J. & Chen, Z. Automotive Li-Ion Batteries: Current Status and Future Perspectives. *Electrochemical Energy*  
665       *Reviews 2019 2:1* **2**, 1–28 (2019).
- 666   12.   Cho, J. Dependence of AlPO<sub>4</sub> coating thickness on overcharge behaviour of LiCoO<sub>2</sub> cathode material at 1 and 2 C rates. *J Power Sources*  
667       **126**, 186–189 (2004).
- 668   13.   Andre, D. *et al.* Future generations of cathode materials: an automotive industry perspective. *J Mater Chem A Mater* **3**, 6709–6732  
669       (2015).
- 670   14.   List of busiest container ports - Wikipedia. [https://en.wikipedia.org/wiki/List\\_of\\_busiest\\_container\\_ports](https://en.wikipedia.org/wiki/List_of_busiest_container_ports).

- 671 15. Cost To Ship A Car - Easy Auto Ship | Shipping Made Easy. <https://diytransport.com/cost-to-ship-a-car/>.
- 672 16. Car Production by Country 2022. <https://worldpopulationreview.com/country-rankings/car-production-by-country>.
- 673 17. China Dominates the Lithium-ion Battery Supply Chain, but Europe is on the Rise | BloombergNEF. [https://about.bnef.com/blog/china-](https://about.bnef.com/blog/china-dominates-the-lithium-ion-battery-supply-chain-but-europe-is-on-the-rise/)  
674 [dominates-the-lithium-ion-battery-supply-chain-but-europe-is-on-the-rise/](https://about.bnef.com/blog/china-dominates-the-lithium-ion-battery-supply-chain-but-europe-is-on-the-rise/).
- 675 18. Four Companies Leading the Rise of Lithium & Battery Technology – Global X ETFs. [https://www.globalxetfs.com/four-companies-leading-](https://www.globalxetfs.com/four-companies-leading-the-rise-of-lithium-battery-technology/)  
676 [the-rise-of-lithium-battery-technology/](https://www.globalxetfs.com/four-companies-leading-the-rise-of-lithium-battery-technology/).
- 677 19. The Top 10 EV Battery Makers - IEEE Spectrum. <https://spectrum.ieee.org/the-top-10-ev-battery-makers>.
- 678 20. CANBusCommunications. <https://www.naii.com/CANBusCommunications>.
- 679 21. CAN Bus interface module - 1351 series - Curtis Instruments. [https://www.directindustry.com/prod/curtis-instruments/product-199498-](https://www.directindustry.com/prod/curtis-instruments/product-199498-2336802.html)  
680 [2336802.html](https://www.directindustry.com/prod/curtis-instruments/product-199498-2336802.html).
- 681 22. CAN Bus interface module - TD5(3)31SCANFD series - MORNSUN Guangzhou Science & Technology Co.,Ltd. - industrial.  
682 <https://www.directindustry.com/prod/mornsun-guangzhou-science-technology-co-ltd/product-157704-2379070.html>.
- 683 23. Optionskarten | AMKmotion. <https://amk-motion.com/en/node/65>.
- 684 24. Autonics. <https://www.autonics.com/main>.
- 685 25. Automotive Imaging Sensors | Image Sensors | OMNIVISION. <https://www.ovt.com/applications/automotive/>.
- 686 26. Camera for the automotive industry - CV-CC214 series - Caravision Technology Inc. - for vehicles / industrial / digital.  
687 <https://www.directindustry.com/prod/caravision-technology-inc/product-210337-2190317.html>.
- 688 27. Top 5 Vehicle Camera Manufacturers - Verified Market Research. [https://www.verifiedmarketresearch.com/blog/top-vehicle-camera-](https://www.verifiedmarketresearch.com/blog/top-vehicle-camera-manufacturers/)  
689 [manufacturers/](https://www.verifiedmarketresearch.com/blog/top-vehicle-camera-manufacturers/).
- 690 28. Top 5 Vendors in the Automotive Camera Module Market - COVID Impact | Technavio | Business Wire.  
691 [https://www.businesswire.com/news/home/20200909005165/en/Top-5-Vendors-in-the-Automotive-Camera-Module-Market---COVID-](https://www.businesswire.com/news/home/20200909005165/en/Top-5-Vendors-in-the-Automotive-Camera-Module-Market---COVID-Impact-Technavio)  
692 [Impact-Technavio](https://www.businesswire.com/news/home/20200909005165/en/Top-5-Vendors-in-the-Automotive-Camera-Module-Market---COVID-Impact-Technavio).
- 693 29. Pyroelectric infrared sensor - SGXV02-100 - FATRI France - thermopile / for portable infrared thermometer.  
694 <https://www.directindustry.com/prod/fatri-france/product-234740-2362468.html>.

- 695 30. Product finder encoders - Johannes Hübner Giessen. <https://www.huebner-giessen.com/en/products/encoders/product-finder/?page=1>.
- 696 31. Sensor Technology | Newark. [https://mexico.newark.com/sensor-technology?ICID=I-CT-LP-TC-000023-SMART\\_IOT\\_PARKING-SENSING-APR21-W2467685](https://mexico.newark.com/sensor-technology?ICID=I-CT-LP-TC-000023-SMART_IOT_PARKING-SENSING-APR21-W2467685).
- 697
- 698 32. InGaAs Photodiodes | OSI Optoelectronics. [https://osioptoelectronics.com/standard-products/ingaas-photodiodes.aspx?gclid=CjwKCAjw5s6WBhA4EiwACGncZSMdJ3eolHSCfNKp-skPGY3aLxaq01qaOEa-ZasLEAQnRcVvkiB\\_ZhoCYmIQAvD\\_BwE](https://osioptoelectronics.com/standard-products/ingaas-photodiodes.aspx?gclid=CjwKCAjw5s6WBhA4EiwACGncZSMdJ3eolHSCfNKp-skPGY3aLxaq01qaOEa-ZasLEAQnRcVvkiB_ZhoCYmIQAvD_BwE).
- 699
- 700
- 701 33. SEMITEC KOREA – Thermistor,IR Sensor,Sensor assembly. <http://eng.semiteckorea.com/>.
- 702 34. Buy Obstacle Avoidance IR Sensor Module at Low Price In India. <https://robu.in/product/ir-infrared-obstacle-avoidance-sensor-module/>.
- 703 35. China Customized Infrared Sensor Manufacturers - Bulk Low Price Infrared Sensor in Stock - EPT. <https://www.eptsensor.com/infrared-sensor/>.
- 704
- 705 36. Infrared detectors | Hamamatsu Photonics. <https://www.hamamatsu.com/eu/en/product/optical-sensors/infrared-detector.html>.
- 706 37. Ultrasonic distance sensors | Baumer France. <https://www.baumer.com/fr/en/product-overview/distance-measurement/ultrasonic-distance-sensors/c/290>.
- 707
- 708 38. Mühendisler Elektrik San. ve Tic. Ltd. Şti. - SCAN. <http://www.muhendisler.com.tr/content/blogsection/5/71/lang,turkish/index.html>.
- 709 39. Buy Ultrasonic Sensors - Distrelec Germany. [https://www.distrelec.de/en/sensors/ultrasonic-sensors/c/cat-DNAV\\_PL\\_1316](https://www.distrelec.de/en/sensors/ultrasonic-sensors/c/cat-DNAV_PL_1316).
- 710 40. Catalogs | Product Catalogues from Pepperl+Fuchs. <https://www.pepperl-fuchs.com/global/en/17733.htm>.
- 711 41. SENSORTEC Co., Ltd South Korea Manufacturers, suppliers.
- 712 [https://sensortec.tradekorea.com/main.do;JSESSIONID\\_TK=4f4MGUI7kpQkvkGK7p-bqualeClygZycvh9575WI777uUwMWHvII-1458379923!2146405622](https://sensortec.tradekorea.com/main.do;JSESSIONID_TK=4f4MGUI7kpQkvkGK7p-bqualeClygZycvh9575WI777uUwMWHvII-1458379923!2146405622).
- 713
- 714 42. Ultrasonic Sensor Module - Ultrasonic Motion Sensor Latest Price, Manufacturers & Suppliers.
- 715 <https://dir.indiamart.com/impcat/ultrasonic-sensor-module.html>.
- 716 43. Solution by ultrasonic inspection· measurement product's development | Japan Probe Co, Ltd. <https://www.jp-probe.com/en/>.
- 717 44. China Ultrasonic Sensor Manufacturers, Suppliers, Factory, Wholesale - ShenZhen OSENON Technology Co.,Ltd. <https://www.osenon-ultrasonicsensors.com/ultrasonic-sensor-1>.
- 718

- 719 45. JSLiDAR - HOME. <http://jslidar.co.kr/en/>.
- 720 46. Toshiba's New Palm-sized Projector Unit Pushes LiDAR's Detection Range to 300m, the World's Longest, with Industry-leading Image  
721 Quality -Flexibility to combine multiple projectors allows customization of detection range and angle, realizes wide application from  
722 autonomous driving to infrastructure monitoring.- | Corporate Research & Development Center | Toshiba.  
723 <https://www.global.toshiba/ww/technology/corporate/rdc/rd/topics/22/2203-02.html>.
- 724 47. RoboSense LiDAR - Autonomous Driving, Robots, V2X. <https://www.robosense.ai/en>.
- 725 48. Top 10 LiDAR Manufacturers in World | Market Research Reports® Inc. <https://www.marketresearchreports.com/blog/2019/04/22/top-10-lidar-manufacturers-world>.  
726
- 727 49. Samaras, C. & Meisterling, K. Life cycle assessment of greenhouse gas emissions from plug-in hybrid vehicles: Implications for policy.  
728 *Environ Sci Technol* **42**, 3170–3176 (2008).
- 729 50. BYD Qin EV | Specs | Dimensions | Range | Battery | Price | Qin Pro EV | WattEV2Buy. <https://wattEV2Buy.com/electric-vehicles/byd-electric-vehicles/byd-qin-ev300-ev/>.  
730
- 731 51. Report: EV battery costs hit another low in 2021, but they might rise in 2022. [https://www.greencarreports.com/news/1134307\\_report-ev-battery-costs-might-rise-in-2022](https://www.greencarreports.com/news/1134307_report-ev-battery-costs-might-rise-in-2022).  
732
- 733 52. ROBOSENSE RS-LiDAR-M1 is officially on sale priced at \$1,898 - Geospatial World. <https://www.geospatialworld.net/news/robosense-rs-lidar-m1-is-officially-on-sale-priced-at-1898/>.  
734
- 735 53. Meet WARLORD: Metawave Aims to Bring Millimeter-Wave RADAR Sensors to the Automotive Industry - News.  
736 <https://www.allaboutcircuits.com/news/millimeter-wave-RADAR-sensors-entering-automotive-industry-Metawave/>.
- 737 54. Compare electric vehicles - EV Database. <https://ev-database.org/#sort:path~type~order=.rank~number~desc|range-slider-range:prev~next=0~1200|range-slider-acceleration:prev~next=2~23|range-slider-topspeed:prev~next=110~450|range-slider-battery:prev~next=10~200|range-slider-towweight:prev~next=0~2500|range-slider-fastcharge:prev~next=0~1500|paging:currentPage=0|paging:number=9>.  
738  
739  
740
- 741 55. Toyota BZ4X 2022 Price In Japan , Features And Specs - Ccarprice JPY. <https://www.ccarprice.com/jp/toyota-bz4x-2022-price-in-japan-7627>.  
742
- 743 56. LS CH32 Automotive Grade 3D LiDAR designed for Automotive Grade Standards to meet the demands of L4 and L5 Autonomous Cars – Oz  
744 Robotics. <https://ozrobotics.com/shop/ls-ch32-automotive-grade-3d-lidar/>.



- 745 57. Amazon.co.jp: KIMISS REIWA 12V Universal Blind Spot Detection Monitoring System Kit BSD Sensor : Automotive.  
746 <https://www.amazon.co.jp/-/en/KIMISS-Universal-Detection-Monitoring-System/dp/B08H81ZX9Y>.
- 747 58. Hyundai Mobis MAR120 Blind Spot Radar (99140-AA020) Teardown. [https://www.reverse-](https://www.reverse-costing.com/teardowns/hyundai%20mobis_mar120_blind_spot_radar/#features)  
748 [costing.com/teardowns/hyundai%20mobis\\_mar120\\_blind\\_spot\\_radar/#features](https://www.reverse-costing.com/teardowns/hyundai%20mobis_mar120_blind_spot_radar/#features).
- 749 59. Nissan LEAF gets upgrades for Japanese market. [https://global.nissannews.com/en/releases/release-](https://global.nissannews.com/en/releases/release-d47e2bd8192d14c383483ebde7066762-191216-01-e)  
750 [d47e2bd8192d14c383483ebde7066762-191216-01-e](https://global.nissannews.com/en/releases/release-d47e2bd8192d14c383483ebde7066762-191216-01-e).
- 751 60. NISSAN LEAF EV | Specs | Range | Price | Battery | Charge Cost | WattEV2Buy. [https://wattev2buy.com/electric-vehicles/nissan/nissan-](https://wattev2buy.com/electric-vehicles/nissan/nissan-leaf/)  
752 [leaf/](https://wattev2buy.com/electric-vehicles/nissan/nissan-leaf/).
- 753 61. LS CX16 3D Surround LiDAR for Autonomous Vehicle, ADAS, Smart Transportation, Service Robots, Logistics, Surveying, Mapping and  
754 Security – Oz Robotics. <https://ozrobotics.com/shop/ls-cx16-3d-surround-lidar/>.
- 755 62. Amazon.co.jp: Blind Spot Sensor 24GHZ Blind Spot Detection System Spot Detector [4 in 1] IP67 BSD, BSM, RCTA 12V Car Security Driving  
756 Alarm, Detects Vehicles From Rear : Automotive. [https://www.amazon.co.jp/-/en/Detection-Detector-Security-Driving-](https://www.amazon.co.jp/-/en/Detection-Detector-Security-Driving-Vehicles/dp/B081ND2HKQ/ref=pb_allspark_dp_sims_pao_desktop_session_based_2/356-6470956-1804326?pd_rd_w=y12Rm&pf_rd_p=2562f525-4075-4561-9863-48d7a49161bd&pf_rd_r=H1534SDT8TNY07SW53WH&pd_rd_r=2a8ac42a-3c09-43fa-92a0-74c62ae063ff&pd_rd_wg=nfgmO&pd_rd_i=B081ND2HKQ&psc=1)  
757 [Vehicles/dp/B081ND2HKQ/ref=pb\\_allspark\\_dp\\_sims\\_pao\\_desktop\\_session\\_based\\_2/356-6470956-](https://www.amazon.co.jp/-/en/Detection-Detector-Security-Driving-Vehicles/dp/B081ND2HKQ/ref=pb_allspark_dp_sims_pao_desktop_session_based_2/356-6470956-1804326?pd_rd_w=y12Rm&pf_rd_p=2562f525-4075-4561-9863-48d7a49161bd&pf_rd_r=H1534SDT8TNY07SW53WH&pd_rd_r=2a8ac42a-3c09-43fa-92a0-74c62ae063ff&pd_rd_wg=nfgmO&pd_rd_i=B081ND2HKQ&psc=1)  
758 [1804326?pd\\_rd\\_w=y12Rm&pf\\_rd\\_p=2562f525-4075-4561-9863-](https://www.amazon.co.jp/-/en/Detection-Detector-Security-Driving-Vehicles/dp/B081ND2HKQ/ref=pb_allspark_dp_sims_pao_desktop_session_based_2/356-6470956-1804326?pd_rd_w=y12Rm&pf_rd_p=2562f525-4075-4561-9863-48d7a49161bd&pf_rd_r=H1534SDT8TNY07SW53WH&pd_rd_r=2a8ac42a-3c09-43fa-92a0-74c62ae063ff&pd_rd_wg=nfgmO&pd_rd_i=B081ND2HKQ&psc=1)  
759 [48d7a49161bd&pf\\_rd\\_r=H1534SDT8TNY07SW53WH&pd\\_rd\\_r=2a8ac42a-3c09-43fa-92a0-](https://www.amazon.co.jp/-/en/Detection-Detector-Security-Driving-Vehicles/dp/B081ND2HKQ/ref=pb_allspark_dp_sims_pao_desktop_session_based_2/356-6470956-1804326?pd_rd_w=y12Rm&pf_rd_p=2562f525-4075-4561-9863-48d7a49161bd&pf_rd_r=H1534SDT8TNY07SW53WH&pd_rd_r=2a8ac42a-3c09-43fa-92a0-74c62ae063ff&pd_rd_wg=nfgmO&pd_rd_i=B081ND2HKQ&psc=1)  
760 [74c62ae063ff&pd\\_rd\\_wg=nfgmO&pd\\_rd\\_i=B081ND2HKQ&psc=1](https://www.amazon.co.jp/-/en/Detection-Detector-Security-Driving-Vehicles/dp/B081ND2HKQ/ref=pb_allspark_dp_sims_pao_desktop_session_based_2/356-6470956-1804326?pd_rd_w=y12Rm&pf_rd_p=2562f525-4075-4561-9863-48d7a49161bd&pf_rd_r=H1534SDT8TNY07SW53WH&pd_rd_r=2a8ac42a-3c09-43fa-92a0-74c62ae063ff&pd_rd_wg=nfgmO&pd_rd_i=B081ND2HKQ&psc=1).
- 761 63. Continental ARS5-A ARS540 4D Long-Range Radar (66 31 5 A55 CB1) Teardown. [https://www.reverse-](https://www.reverse-costing.com/teardowns/continental_ars5a_ars540_4d_longrange_radar/#features)  
762 [costing.com/teardowns/continental\\_ars5a\\_ars540\\_4d\\_longrange\\_radar/#features](https://www.reverse-costing.com/teardowns/continental_ars5a_ars540_4d_longrange_radar/#features).
- 763 64. Altima Configurator | Packages | Nissan USA. [https://www.nissanusa.com/shopping-tools/build-](https://www.nissanusa.com/shopping-tools/build-price/cars/altima/2022/fwd/29413:BABc0:AxZCUxWA/packages)  
764 [price/cars/altima/2022/fwd/29413:BABc0:AxZCUxWA/packages](https://www.nissanusa.com/shopping-tools/build-price/cars/altima/2022/fwd/29413:BABc0:AxZCUxWA/packages).
- 765 65. Tata Nexon EV XZ Plus Lux Dark Edition On Road Price (Electric(Battery)), Features & Specs, Images.  
766 [https://www.cardekho.com/overview/Tata\\_Nexon\\_EV/Tata\\_Nexon\\_EV\\_XZ\\_Plus\\_Lux\\_Dark\\_Edition.htm](https://www.cardekho.com/overview/Tata_Nexon_EV/Tata_Nexon_EV_XZ_Plus_Lux_Dark_Edition.htm).
- 767 66. OUSTER ANNOUNCES FIRST HIGH-PERFORMANCE TRUE SOLID-STATE DIGITAL LIDAR SENSOR. [https://iot-automotive.news/ouster-](https://iot-automotive.news/ouster-announces-first-high-performance-true-solid-state-digital-lidar-sensor/)  
768 [announces-first-high-performance-true-solid-state-digital-lidar-sensor/](https://iot-automotive.news/ouster-announces-first-high-performance-true-solid-state-digital-lidar-sensor/).
- 769 67. Price - IONIQ 5 – HYDROGEN/ELECTRIC | HYUNDAI Motors. <https://www.hyundai.com/kr/en/fcev-ev/ioniq5/price>.
- 770 68. OLEI LR-16F 3D 16-channel LiDAR. <https://morpheustek.com/shop/lidar/olei-3d-lidar/>.

- 771 69. T-79: 79 GHz Radar Automotive Safety Radar | Ainstein. <https://ainstein.ai/vehicle-radar/short-range-wideband-high-resolution-automotive-radar-sensor/>.  
772
- 773 70. Costs and Outlook of On-Board Equipment for Connected Vehicles | U.S. Department of Transportation.  
774 <https://www.itskrs.its.dot.gov/its/benecost.nsf/ID/26d0d89dc2f1144185257bb40064d1b6>.
- 775 71. Tesla Motors Inc. Is Using NVIDIA Corporation's Drive PX 2 | The Motley Fool. <https://www.fool.com/investing/2016/10/27/tesla-motors-inc-is-using-nvidia-corporations-driv.aspx>.  
776
- 777 72. Amazon.com: Garmin Drive 51 USA LM GPS Navigator System with Lifetime Maps, Spoken Turn-By-Turn Directions, Direct Access, Driver  
778 Alerts, TripAdvisor and Foursquare Data : Electronics. [https://www.amazon.com/Garmin-Navigator-Directions-TripAdvisor-Foursquare/dp/B01NBM6JUV/ref=sr\\_1\\_3?c=ts&keywords=Vehicle%2BGPS%2BUnits%2B%26%2BEquipment&qid=1649080396&s=gps&sr=1-3&ts\\_id=559938&th=1](https://www.amazon.com/Garmin-Navigator-Directions-TripAdvisor-Foursquare/dp/B01NBM6JUV/ref=sr_1_3?c=ts&keywords=Vehicle%2BGPS%2BUnits%2B%26%2BEquipment&qid=1649080396&s=gps&sr=1-3&ts_id=559938&th=1).  
779  
780
- 781 73. Cellular-V2X (C-V2X) communication modules that use wireless wide-area network (WWAN) cellular modems to broadcast and receive  
782 basic safety messages (BSM) can be supplied to automobile manufacturers for less than \$222 per unit. | U.S. Department of  
783 Transportation. <https://www.itskrs.its.dot.gov/its/benecost.nsf/ID/8c2875e02cd554d3852582910068e4f8>.
- 784 74. 2021 Ford® Mustang Mach-E SUV | All-Electric & Exhilarating. <https://www.ford.com/suvs/mach-e/2021/>.
- 785 75. Ford Mustang Mach-E ER RWD - (Battery Energy 98.7 kWh, Torque 430 Nm) - Electric Vehicles Database.  
786 <https://evehiclesdb.com/transport/ford-mustang-mach-e-er-rwd/>.
- 787 76. Luminar Surges On Plan To Supply Laser Sensors For Nvidia's Self-Driving Car Platform.  
788 <https://www.forbes.com/sites/alanohnsman/2021/11/09/luminar-to-supply-laser-sensors-for-nvidias-self-driving-car-platform/?sh=531d4d245645>.  
789
- 790 77. Ford Co-Pilot360™ Technology Adds Hands-Free Driving, Over-The-Air Updates and More to Help Ford Customers Feel More Relaxed and  
791 Confident | Ford Media Center. <https://media.ford.com/content/fordmedia/fna/us/en/news/2020/06/18/ford-co-pilot360-technology-adds-hands-free-driving.html>.  
792
- 793 78. AR1820HSSC12SHQAH3-GEVB onsemi | Mouser. <https://www.mouser.com/ProductDetail/onsemi/AR1820HSSC12SHQAH3-GEVB?qs=GWuLPj4sST14IGqDQio0oA%3D%3D>.  
794
- 795 79. onsemi AR1820HS CMOS Image Sensor | EBV Elektronik. <https://www.avnet.com/wps/portal/ebv/products/new-products/np/2017/onsemi-AR1820HS>.  
796

- 797 80. AR1820HS: CMOS Image Sensor, 18 MP, 1/2.3". <https://www.onsemi.com/products/sensors/image-sensors/ar1820hs>.
- 798 81. Build & Price | Ford® Mach-E All-Electric SUV. [https://www.ford.com/buy/mach-e/build-and-price.html?config=WANAB-CGW-2022-CX727#/extras/AACVB?series=VS-KX&powertrain=DR--F\\_EN-C2\\_HTHAE\\_TR-WA&paint=PNZAT&features=HTSADincluded](https://www.ford.com/buy/mach-e/build-and-price.html?config=WANAB-CGW-2022-CX727#/extras/AACVB?series=VS-KX&powertrain=DR--F_EN-C2_HTHAE_TR-WA&paint=PNZAT&features=HTSADincluded).
- 799
- 800 82. Design Your Model S | Tesla. <https://www.tesla.com/models/design#overview>.
- 801 83. New Velodyne LiDAR Puck VLP-16 - SALE !! <https://www.nusahendheld3d.com/3d-lidar-sensors/new-velodyne-lidar-puck-vlp-16---sale>.
- 802 84. Amazon.com: CarBest Ultrasonic Blind Spot Detection System BSD Change Lane Safer BSA BSM Blind Spot Monitoring Assistant Car  
803 Driving Security with Reverse Parking System : Electronics. [https://www.amazon.com/CarBest-Ultrasonic-Detection-Monitoring-Assistant/dp/B07HTNCTGG/ref=sr\\_1\\_11?crid=263IU9IHFRWFL&keywords=ultrasonic+sensor+car&qid=1645263980&srefix=ultrasonic+s+ensor+car%2Caps%2C401&sr=8-11](https://www.amazon.com/CarBest-Ultrasonic-Detection-Monitoring-Assistant/dp/B07HTNCTGG/ref=sr_1_11?crid=263IU9IHFRWFL&keywords=ultrasonic+sensor+car&qid=1645263980&srefix=ultrasonic+s+ensor+car%2Caps%2C401&sr=8-11).
- 804
- 805
- 806 85. 2017 Zacia MX2 18 kWh (46 Hp) Electric | Technical specs, data, fuel consumption, Dimensions. <https://www.auto-data.net/en/zacia-mx2-18-kwh-46hp-electric-38524>.
- 807
- 808 86. There's a 100% Electric Car built by Mexican women, its name is Zacia – The Yucatan Times.  
809 <https://www.theyucatanimes.com/2022/02/theres-a-100-electric-car-built-by-mexican-women-its-name-is-zacia/>.
- 810 87. 2017 Zacia MX2 18 kWh (46 Hp) Electric | Technical specs, data, fuel consumption, Dimensions. <https://www.auto-data.net/en/zacia-mx2-18-kwh-46hp-electric-38524>.
- 811
- 812 88. Horizon lidar sensor - Livox. <https://www.livoxtech.com/horizon>.
- 813 89. Konfigurator. [https://www.volkswagen.de/de/konfigurator.html/\\_\\_app/%2Fid-4.app](https://www.volkswagen.de/de/konfigurator.html/__app/%2Fid-4.app).
- 814 90. New - Sick 3D LiDAR sensors LD-MRS/LD-MRS 8-Layer/Outdoor - SALE !! <https://www.nusahendheld3d.com/3d-lidar-sensors/new---sick-3d-lidar-sensors-ld-mrsl-d-mrs-8-layeroutdoor---sale>.
- 815
- 816 91. PoeHXtyy Ultrasonic Blind Spot Detection System BSD Lane Change Safe Assistant for Monitoring Blind Spot Safety Driving : Amazon.de:  
817 Automotive. [https://www.amazon.de/-/en/PoeHXtyy-Ultrasonic-Detection-Assistant-Monitoring/dp/B085VPF6ZY/ref=pd\\_lpo\\_2?pd\\_rd\\_i=B085VPF6ZY&pisc=1](https://www.amazon.de/-/en/PoeHXtyy-Ultrasonic-Detection-Assistant-Monitoring/dp/B085VPF6ZY/ref=pd_lpo_2?pd_rd_i=B085VPF6ZY&pisc=1).
- 818
- 819 92. le Gac, D. COMPLETE TEARDOWN WITH: • Detailed photos Bosch LRR4 77GHz Long Range Radar Sensor Title: Bosch LLR4 77GHz Radar  
820 The fourth generation of Bosch long range radar sensor sets new standards for a more elegant, compact and cost effective module.  
821 (2017).

- 822 93. Konfigurator.  
823 [824 AT,S04AW,S04U9,S0534,S0544,S0548,S05AQ,S05DA,S05DM,S0654,S06AE,S06AF,S06AK,S06C4,S06U2,S06UX,S06VB,S06WC,S0801,S0851,](https://configure.bmw.de/de_DE/configure/G26E/71AW/FKFSW,P0668,S01CB,S0230,S0255,S02PA,S02VB,S03F0,S0428,S0431,S0493,S04)  
825 [S0879,S08R9,S08TF,S09QX/EI0000E6,SE000001](https://configure.bmw.de/de_DE/configure/G26E/71AW/FKFSW,P0668,S01CB,S0230,S0255,S02PA,S02VB,S03F0,S0428,S0431,S0493,S04AT,S04AW,S04U9,S0534,S0544,S0548,S05AQ,S05DA,S05DM,S0654,S06AE,S06AF,S06AK,S06C4,S06U2,S06UX,S06VB,S06WC,S0801,S0851,S0879,S08R9,S08TF,S09QX/EI0000E6,SE000001).
- 826 94. What is night vision, how does it work, and do I really need it in my next car? - ExtremeTech.  
827 <https://www.extremetech.com/extreme/193402-what-is-night-vision-how-does-it-work-and-do-i-really-need-it-in-my-next-car>.
- 828 95. BOSCH LRR4 Long Range Radar (4N0 907 561) Teardown. [https://www.reverse-costing.com/teardowns/bosch\\_lrr4/#features](https://www.reverse-costing.com/teardowns/bosch_lrr4/#features).
- 829 96. Build Your Own – Add Packages, Features, Options – BMW USA. [https://www.bmwusa.com/build-your-](https://www.bmwusa.com/build-your-own.iframe.html#/studio/ep11l293/options)  
830 [own.iframe.html#/studio/ep11l293/options](https://www.bmwusa.com/build-your-own.iframe.html#/studio/ep11l293/options).
- 831 97. Yerli otomobil rakiplerine teknik fark atacak. [https://www.haberturk.com/yerli-otomobil-rakiplerine-teknik-fark-atacak-2553792-](https://www.haberturk.com/yerli-otomobil-rakiplerine-teknik-fark-atacak-2553792-ekonomi)  
832 [ekonomi](https://www.haberturk.com/yerli-otomobil-rakiplerine-teknik-fark-atacak-2553792-ekonomi).
- 833 98. How Much Will TOGG Cost? What is the Sales Price of the Domestic Car? [https://www.raillynews.com/2021/11/how-much-will-the-togg-](https://www.raillynews.com/2021/11/how-much-will-the-togg-cost-be-how-much-is-the-sales-price-of-the-domestic-car/)  
834 [cost-be-how-much-is-the-sales-price-of-the-domestic-car/](https://www.raillynews.com/2021/11/how-much-will-the-togg-cost-be-how-much-is-the-sales-price-of-the-domestic-car/).
- 835 99. New- Quanergy M8 Prime Plus 3D Lidar Sensors - SALE !! [https://www.nusahendheld3d.com/new--quanergy-m8-prime-plus-3d-lidar-](https://www.nusahendheld3d.com/new--quanergy-m8-prime-plus-3d-lidar-sensors---sale)  
836 [sensors---sale](https://www.nusahendheld3d.com/new--quanergy-m8-prime-plus-3d-lidar-sensors---sale).
- 837 100. Configurateur Renault ZOE – Renault. <https://www.renault.fr/vehicules-electriques/zoe/configurateur.html>.
- 838 101. Cepton sets sub-\$1000 price for latest auto lidar product. <https://optics.org/news/11/9/40>.
- 839 102. Valeo Retrofit Kit Blind Spot Assistant 632300 : Amazon.de: Electronics & Photo. [https://www.amazon.de/-/en/Valeo-Retrofit-Blind-](https://www.amazon.de/-/en/Valeo-Retrofit-Blind-Assistant-632300/dp/B084BKQ14V/ref=pd_lpo_1?pd_rd_i=B084BKQ14V&psc=1)  
840 [Assistant-632300/dp/B084BKQ14V/ref=pd\\_lpo\\_1?pd\\_rd\\_i=B084BKQ14V&psc=1](https://www.amazon.de/-/en/Valeo-Retrofit-Blind-Assistant-632300/dp/B084BKQ14V/ref=pd_lpo_1?pd_rd_i=B084BKQ14V&psc=1).
- 841 103. smartmicro Radar Sensor: UMRR-96 | Level Five Supplies. [https://levelfivesupplies.com/product/automotive-radar-sensor-umrr-96-type-](https://levelfivesupplies.com/product/automotive-radar-sensor-umrr-96-type-153/)  
842 [153/](https://levelfivesupplies.com/product/automotive-radar-sensor-umrr-96-type-153/).
- 843 104. Qatar General Electricity & water Corporation - المؤسسة العامة القطرية للكهرباء والماء. <https://www.km.qa/Pages/default.aspx>.
- 844 105. Kavas-Torris, O., Cantas, M. R., Aksun-Guvenc, B., Guvenc, L. & Cime, K. M. The Effects of Varying Penetration Rates of L4-L5 Autonomous  
845 Vehicles on Fuel Efficiency and Mobility of Traffic Networks ADAS enhanced Powertrain Controls View project The Effects of Varying  
846 Penetration Rates of L4-L5 Autonomous Vehicles on Fuel Efficiency and Mobility of Traffic Networks. doi:10.4271/2020-01-0137.

- 847 106. Recycling and Climate Change | NC DEQ. <https://deq.nc.gov/conservation/recycling/recycling-climate-change>.
- 848 107. Sixth Assessment Report — IPCC. <https://www.ipcc.ch/assessment-report/ar6/>.
- 849 108. McKone, T. E. *et al.* Grand challenges for life-cycle assessment of biofuels. *Environ Sci Technol* **45**, 1751–1756 (2011).
- 850 109. Lloyd, S. M. & Ries, R. Characterizing, Propagating, and Analyzing Uncertainty in Life-Cycle Assessment: A Survey of Quantitative  
851 Approaches. *J Ind Ecol* **11**, 161–179 (2007).
- 852
